# Supplementary material for: Monitoring young lifestyles (MyLife) - a prospective longitudinal quantitative and qualitative study of youth development and substance use in Norway
Source: PubMed Central journal article supplement — BMJ Open. 2019 Oct 28;9(10):e031084. doi: 10.1136/bmjopen-2019-031084 (PMC6830719; doi:10.1136/bmjopen-2019-031084), 2019-10-28
Supplement: bmjopen-2019-031084.draft_revisions.pdf [file bmjopen-2019-031084.draft_revisions.pdf]

# BMJ Open

BMJ Open is committed to open peer review. As part of this commitment we make the peer review history of every article we publish publicly available.

When an article is published we post the peer reviewers' comments and the authors' responses online. We also post the versions of the paper that were used during peer review. These are the versions that the peer review comments apply to.

The versions of the paper that follow are the versions that were submitted during the peer review process. They are not the versions of record or the final published versions. They should not be cited or distributed as the published version of this manuscript.

BMJ Open is an open access journal and the full, final, typeset and author-corrected version of record of the manuscript is available on our site with no access controls, subscription charges or pay-per-view fees (<http://bmjopen.bmj.com>).

If you have any questions on BMJ Open's open peer review process please email [info.bmjopen@bmj.com](mailto:info.bmjopen@bmj.com)

# BMJ Open

## Cohort profile: Monitoring Young Lifestyles (MyLife), a prospective longitudinal quantitative and qualitative study of youth development and substance use in Norway

|                               |                                                                                                                                                                                                                                                                                                                                                                                                                                                                                                                                                                                                                                      |
|-------------------------------|--------------------------------------------------------------------------------------------------------------------------------------------------------------------------------------------------------------------------------------------------------------------------------------------------------------------------------------------------------------------------------------------------------------------------------------------------------------------------------------------------------------------------------------------------------------------------------------------------------------------------------------|
| Journal:                      | <i>BMJ Open</i>                                                                                                                                                                                                                                                                                                                                                                                                                                                                                                                                                                                                                      |
| Manuscript ID                 | bmjopen-2019-031084                                                                                                                                                                                                                                                                                                                                                                                                                                                                                                                                                                                                                  |
| Article Type:                 | Cohort profile                                                                                                                                                                                                                                                                                                                                                                                                                                                                                                                                                                                                                       |
| Date Submitted by the Author: | 15-Apr-2019                                                                                                                                                                                                                                                                                                                                                                                                                                                                                                                                                                                                                          |
| Complete List of Authors:     | Brunborg, Geir Scott; Norwegian Institute of Public Health, Department of Alcohol, Tobacco, and Drugs<br>Scheffels, Janne; Norwegian Institute of Public Health, Department of Alcohol, Tobacco, and Drugs<br>Tokle, Rikke; Norwegian Institute of Public Health, Department of Alcohol, Tobacco, and Drugs<br>Buvik, Kristin; Norwegian Institute of Public Health, Department of Alcohol, Tobacco, and Drugs<br>Kvaavik, Elisabeth; Norwegian Institute of Public Health, Department of Alcohol, Tobacco, and Drugs<br>Burdzovic Andreas, Jasmina; Norwegian Institute of Public Health, Department of Alcohol, Tobacco, and Drugs |
| Keywords:                     | prospective cohort, longitudinal study, substance use, adolescent development, QUALITATIVE RESEARCH, quantitative research                                                                                                                                                                                                                                                                                                                                                                                                                                                                                                           |
|                               |                                                                                                                                                                                                                                                                                                                                                                                                                                                                                                                                                                                                                                      |

SCHOLARONE™  
Manuscripts

1  
2  
3 **COHORT PROFILE: Monitoring Young Lifestyles (MyLife), a prospective longitudinal**  
4 **quantitative and qualitative study of youth development and substance use in Norway.**  
5  
6  
7  
8  
9  
10

11  
12 Geir Scott Brunborg<sup>a</sup>  
13 Janne Scheffels<sup>a</sup>  
14 Rikke Tokle<sup>a</sup>  
15 Kristin Buvik<sup>a</sup>  
16 Elisabeth Kvaavik<sup>a</sup>  
17 Jasmina Burdzovic Andreas<sup>a, \*</sup>  
18  
19  
20  
21  
22

23 <sup>a</sup> Norwegian Institute of Public Health  
24 Department of Alcohol, Tobacco, and Drugs  
25 PO Box 222-Skøyen  
26 N-0213 Oslo  
27 Norway  
28  
29

30 \*Corresponding author  
31 Jasmina Burdzovic Andreas, PhD ScM  
32 Norwegian Institute of Public Health  
33 Department of Alcohol, Tobacco, and Drugs  
34 PO Box 222-Skøyen  
35 N-0213 Oslo  
36 Norway  
37  
38  
39

40 Email: [jabu@fhi.no](mailto:jabu@fhi.no)  
41 Phone: (+47) 46 37 95 48  
42  
43

44 **Word Count:** 4,500  
45  
46

47 **Keywords:** prospective cohort, longitudinal study, substance use, adolescent development,  
48 quantitative research, qualitative research  
49  
50  
51  
52  
53  
54  
55  
56  
57  
58  
59  
60

## ABSTRACT

**Purpose:** The Monitoring Young Lifestyles (MyLife) study was initiated as a large-scale mixed-methods prospective longitudinal investigation of correlates, causes, and consequences of adolescent substance use and other addictive behaviors in Norway.

**Participants:** The MyLife cohort comprises 3,512 8<sup>th</sup>, 9<sup>th</sup>, and 10<sup>th</sup> graders (55% girls) who were recruited in 2017 from 33 Norwegian middle schools selected from low, medium, and high standard of living areas in both rural and urban regions. All 3,512 adolescents were enrolled in the quantitative study arm (QT), while 120 were enrolled in the qualitative study arm (QL).

**Findings to date:** Baseline QT assessment was conducted during the 2017 Fall semester, when 2,975 adolescents completed an online questionnaire during regular class time. A total of 2,857 adolescents participated in the first QT follow-up during the 2018 Fall semester. Baseline QL assessment was conducted during the fall of 2014 and the 2015 Fall semester, when 118 8<sup>th</sup> graders completed face-to-face interviews. QL group- and individual follow-ups were conducted in the spring of 2015 and fall of 2017 ( $n = 98$ ) and the spring of 2017 and 2018 ( $n = 95$ ).

**Future plans:** Both QT and QL arms have planned follow-ups through 2021. Consents were obtained for individual-level linkages of adolescent responses to a range of national registries and databases, as well as to the parental responses also obtained at QT baseline. These supplemental data sources will provide key information on additional putative exposures as well as on long-term health, educational, and social outcomes in the MyLife cohort.

### Strengths and limitations of this study

- To the best of our knowledge, the MyLife study is the very first multidisciplinary longitudinal study of youth in Norway to employ a quantitative developmental epidemiology perspective and quantitative survey assessments in combination with qualitative individual and group interviews.
- The study will extend and possibly augment the knowledge of adolescent behavioral health in general, and of substance use in particular, gained by previous studies in Norway.
- Comparative strengths of MyLife rest in its integration of wider age ranges (3 grades/cohorts, 13-16 years old at baseline), sizeable samples (1,000 per grade/cohort), balanced follow-ups (annual, for five years), and mixed longitudinal methods
- The consent and recruitment were limited by privacy and confidentiality concerns, possibly resulting in less-than-ideal study enrollment
- Non-random sampling may have implications for generalizability and related inferences

## INTRODUCTION

Adolescent substance use remains a significant public health concern, notwithstanding recent reports on the declines in underage drinking and smoking (1-4). Negative consequences of such early behaviors are considerable, as early substance use is associated with a range of adverse psychological, social, and health outcomes (5-9). In addition, the Global Burden of Disease project ranks the use of alcohol, tobacco, and other drugs (ATOD) among the most important risk factors for disability adjusted life years in high income countries, including Norway (8). Understanding the use of alcohol, tobacco, and other drugs early in life is therefore of key public health importance, both in Norway and internationally. The current report describes the Monitoring Young Lifestyles (MyLife) study, which was designed as a large-scale longitudinal investigation of youth in Norway specifically aiming to advance our understanding of early substance use and other addictive behaviors, as well as the associated risk factors, consequences and social processes.

Risk and protective factors for early substance use can stem from multiple ecological levels that either alone or in combination can contribute to varied patterns and developmental trajectories of substance use (10-14). Indeed, understanding the developmental course of substance use has become central to understanding the causes, onset, timing, duration, and consequences of these behaviors (15-26). More importantly, detecting and examining different developmental patterns through which substance use problems develop and progress over time can greatly inform not only our understanding of risk and protective factors associated with these behaviors, but of potential prevention and treatment strategies as well (11, 27).

1  
2  
3 Yet, there is a dearth of studies utilizing developmental epidemiology and  
4 developmental psychopathology frameworks (28-30) to address these issues in Norway.  
5  
6 While numerous cross-sectional reports examined various issues associated with early  
7  
8 substance use, ranging from correlates, exposures, risk-perceptions, and diverse cultural and  
9  
10 behavioral patterns (31-39), they cannot fully address the questions of causal pathways and  
11  
12 individual developments and progressions over time. Current knowledge concerning early  
13  
14 substance use in Norway is thus largely based on the results from cross-sectional studies. In  
15  
16 addition, a handful of notable longitudinal reports also remain somewhat limited: even though  
17  
18 they are based on large, well-established prospective studies (e.g., the Young in Norway  
19  
20 Longitudinal Study (40, 41) or the Tracking Opportunities and Problems study (42, 43)) these  
21  
22 projects were not established with the specific and primary purpose of investigating early  
23  
24 substance use and related issues.  
25  
26  
27  
28  
29  
30  
31  
32

33 Given the above-identified gaps in both current knowledge and methodological  
34  
35 approaches, the MyLife study was designed as a large-scale longitudinal investigation of youth  
36  
37 in Norway specifically aiming to advance our understanding of early substance use and other  
38  
39 addictive behaviors, as well as of the associated individual and social processes. In general, we  
40  
41 are interested in finding out how substance use and other addictive behaviors begin, how they  
42  
43 develop over time, and why some continue and/or progresses further into problem behaviors.  
44  
45 These key questions will be investigated both quantitatively and qualitatively over time within  
46  
47 general developmental epidemiology and human ecology theoretical frameworks (10, 11, 44-  
48  
49 47). The results will provide updated insights into a range of putative causes and  
50  
51 consequences of early substance use among contemporary adolescents, of the associated risk  
52  
53 and protective factors, and of developments and transitions over time. Also, a wide range of  
54  
55 research questions can be addressed in secondary data analysis and through planned linkages  
56  
57  
58  
59  
60

1  
2  
3 with other data sources (e.g., national health registries) (48-50). The ultimate aim is to inform  
4  
5 public health policies, and to improve prevention and intervention strategies.  
6  
7

## 8 9 **COHORT DESCRIPTION**

### 10 11 **Study design**

12  
13  
14  
15 The MyLife study aims to investigate a wide range of research questions from diverse  
16  
17 fields (psychology, epidemiology, sociology, etc.), to integrate both quantitative and  
18  
19 qualitative methodologies, and to facilitate in-depth study of developmental issues,  
20  
21 transitions, and risk and protective factors relevant to underage substance use over the  
22  
23 shortest possible investigation period. With this in mind, a prospective longitudinal design  
24  
25 with participants of appropriate ages was selected as the most scientifically and logistically  
26  
27 feasible one. Middle school students were identified as the most appropriate target  
28  
29 population, given that they were of ages immediately preceding the onset of the studied  
30  
31 behaviors, and cognitively capable of informed assent and independent survey and interview  
32  
33 participation. The key aspects of the MyLife core study were informed by the results and  
34  
35 experiences from the 2014 pilot study (38, 51-54).  
36  
37  
38  
39  
40  
41

42  
43 *Quantitative Arm (QT):* The quantitative arm was designed as a multi-cohort study with  
44  
45 five annual prospective assessments (a.k.a., 'accelerated longitudinal design', ALD), where  
46  
47 middle-school students from grades 8 through 10 were recruited. The accelerated longitudinal  
48  
49 design (ALD) was selected as the most efficient prospective design, given the budgetary, time,  
50  
51 and staff constraints (55-57). Comparative advantages of this design rest in its integration of  
52  
53 relatively large sample sizes (approximately 1,000 students from each grade), wider youth  
54  
55 participant age range (3 school cohorts; grades 8, 9, and 10 at baseline) and relatively frequent  
56  
57  
58  
59  
60



1  
2  
3 and balanced follow-ups (annual, for five years) capturing key developmental transitions  
4  
5 during adolescence.  
6  
7

8  
9 *Qualitative Arm (QL):* A few qualitative studies of youth transitions (58, 59) have  
10  
11 utilized longitudinal designs, but to the best of our knowledge, this is the first study to  
12  
13 investigate the social and cultural processes surrounding youth substance use with a  
14  
15 longitudinal qualitative design. The qualitative approach can provide insight into the social  
16  
17 relations in which individual trajectories develop, as well as into the social and cultural  
18  
19 processes that surround adolescents' use of alcohol, tobacco and drugs. As they grow older,  
20  
21 adolescents' understanding of these substances will be challenged and their social identities  
22  
23 as well as their substance use practices can be altered accordingly; repeated interviews can  
24  
25 both map and explore in the ways these changes take place.  
26  
27  
28  
29  
30

31  
32 In sum, the MyLife study will achieve its scientific objectives through two separate, yet  
33  
34 connected, study arms: a) Quantitative (QT); where the core quantitative cohort is to be  
35  
36 followed-up annually for a total of five assessments spanning middle- and high-school years)  
37  
38 and b) Qualitative (QL); where the core qualitative cohort is to be followed-up via group and  
39  
40 individual interviews spanning middle- and high-school years). Inclusion of parental reports  
41  
42 provides much needed additional information/validation beyond youth self-reports, whereas  
43  
44 administrative data from schools and communities enable examination of non-individual  
45  
46 factors potentially shaping developmental trajectories and outcomes. We also aim to link the  
47  
48 quantitative data and parental responses to a range of objective indicators of health,  
49  
50 adjustment, and well-being available through the national registries encompassing data on all  
51  
52 residents in Norway. Study design, cohorts, data sources, and timelines for all planned  
53  
54 assessments are shown in Figure 1.  
55  
56  
57  
58  
59  
60

## Setting

The setting for the study is Norway, a high income country in Northern Europe with a relatively small population, characterized by a generous welfare state with public education and universal health care systems. Norway is ranked number one on the Inequality-adjusted Human Development Index (60). The main behavioral risk factors for disability adjusted life years are tobacco use, poor diet, alcohol use, and drug use (8).

## Sampling

The first step in sampling procedures was completed in 2015, and involved selection of geographical areas within Norway. To ensure geographic and sample diversity, five of the nineteen Norwegian counties were chosen for study inclusion: one each from the north (Troms), from the middle (Sør-Trøndelag), from the west (Møre og Romsdal), from the south (Rogaland), and from the east (Buskerud) of the country, see Figure 2.

The second step in sampling procedures involved ensuring representation of adolescents from both urban and rural areas; that is, from both urban and rural schools. Within each county, we first selected the schools from the largest city in the county, and then schools from rural municipalities – but for practical reasons, still within 2 hours drive from the largest city. Middle schools with fewer than 50 students were excluded because of a poor cost-benefit ratio.

The third step in sampling procedures involved ensuring representation of low, middle, and high standard of living communities. The standard of living index (SLI) is a standardized indicator available from Statistics Norway for all Norwegian municipalities up to 2008 and it reflects community-level characteristics ranging from social security, single parent, and disability payments, mortality and unemployment rates, to individuals in vocational

1  
2  
3 rehabilitation (61). The municipalities within counties, and the districts within cities, were  
4  
5 sorted into low, middle and high SLI categories using tertile splits. Municipalities/districts were  
6  
7 drawn at random from the sorted list using a random number generator so that 30%, 40% and  
8  
9 30% of adolescents were from low, medium and high SLI schools/communities, respectively  
10  
11  
12

13 In almost all cases, there was only one eligible school within each geographical area.  
14  
15 In the few cases where there was more than one school, the target school was selected through  
16  
17 a random number generator. The school selection procedure resulted in 42 schools with  
18  
19 upwards of 9,500 middle school students (see Figure 2 for details). The school enrollments  
20  
21 varied from 54 to 529 middle school students in 2017. All 42 selected schools were contacted  
22  
23 and invited to take part in the MyLife study. Nine schools declined, leaving 33 schools with  
24  
25 about 7,000 middle school students. All currently enrolled students were eligible for study  
26  
27 inclusion; the aim was to obtain full 8<sup>th</sup>, 9<sup>th</sup>, and 10<sup>th</sup> grade cohorts from each school if possible.  
28  
29  
30  
31  
32

### 33 **Informed consent**

34  
35  
36 Because of the respondents' young age, informed parental consent was required  
37  
38 before the children could be invited to participate, or give assent for own participation in the  
39  
40 MyLife study. The schools were provided with packages containing a booklet describing the  
41  
42 study, consent form, and a secure return envelope; this information package was  
43  
44 administered to all students during class time to take home to their parents. Students were  
45  
46 asked to share this MyLife study information with their parents and to return sealed envelopes  
47  
48 with completed consent forms to their teachers by a deadline; we asked that the forms be  
49  
50 returned even if no consent for study participation was granted. Parents were asked to  
51  
52 consent to their child(ren)'s participation in all of the planned five annual rounds of the  
53  
54 quantitative arm of the study. This involved completing a 30-minute questionnaire during a  
55  
56  
57  
58  
59  
60

1  
2  
3 school hour while they were in middle school, and in a private setting after they left middle  
4  
5 school. The consent also involved permission for the individual-level linkage of questionnaire  
6  
7 data to the data obtained from the national health (e.g., information on primary and  
8  
9 specialized health utilization) and other registries (e.g., information on education, welfare,  
10  
11 and unemployment) pending appropriate ethical and research approvals. In addition, parents  
12  
13 were asked to consent to be invited to complete a brief electronic questionnaire of their own  
14  
15 and, if so, to future registry linkages as well. In the beginning of the 2017 Fall semester, 4,195  
16  
17 valid consent forms were returned. Parental consent was obtained for 3,512 children. A total  
18  
19 of 3,035 parents also consented to their own study participation. The individual consent rate  
20  
21 varied widely across schools, ranging from 23.2% to 96.1% (Mean consent rate = 48.4%,  
22  
23 Standard deviation = 15.33). The inclusion flow for QT is shown in Figure 2, including the  
24  
25 baseline data collection.  
26  
27  
28  
29  
30  
31

32  
33 A subgroup of 145 students from six schools (one class per school) were also asked to  
34  
35 consent to the child's participation in the qualitative study, involving both individual and group  
36  
37 interviews over time. Consent for the qualitative study was obtained for 120 students; see  
38  
39 Figure 3 for QL flow.  
40  
41  
42

### 43 **Patient and public involvement**

44  
45  
46 This study involved no patients. Focus groups consisting of adolescents and middle  
47  
48 school teachers were involved in study design by providing feedback concerning the QT  
49  
50 surveys content and administration modes. School principals and contact persons also  
51  
52 provided feedback after baseline data collection/administration, which aided in fine-tuning of  
53  
54 the follow-up procedures. Study progress and selected aggregate results are shared with  
55  
56  
57  
58  
59  
60

those directly involved (schools, parents, adolescents) through semi-annual newsletters, and with general public via the project NIPH-based website.

### THE MYLIFE COHORT

The MyLife core QT cohort comprises a total of 3,512 8<sup>th</sup>, 9<sup>th</sup>, and 10<sup>th</sup> grade middle-school students with valid parental consent, who are invited to each of the five annual assessments. A brief overview of the QT core cohort characteristics is presented in Table 1.

**Table 1.**  
**Brief overview of MyLife core QT cohort characteristics (N = 3,512)**

| Variables                                                  | N     | %     |
|------------------------------------------------------------|-------|-------|
| <b>Gender:</b>                                             |       |       |
| Girls                                                      | 1,923 | 54.8% |
| Boys                                                       | 1,589 | 45.2% |
| <b>Birthday year:</b>                                      |       |       |
| 2001                                                       | 12    | 0.3%  |
| 2002                                                       | 998   | 28.4% |
| 2003                                                       | 1,214 | 34.6% |
| 2004                                                       | 1,286 | 36.6% |
| 2005                                                       | 2     | 0.01% |
| <b>County:</b>                                             |       |       |
| Buskerud (East)                                            | 497   | 14.2% |
| Møre og Romsdal (West)                                     | 568   | 16.2% |
| Rogaland (South)                                           | 1,137 | 32.4% |
| Sør-Trøndelag (Middle)                                     | 949   | 27.0% |
| Troms (North)                                              | 361   | 10.3% |
| <b>School location:</b>                                    |       |       |
| Rural municipality                                         | 1,293 | 36.8% |
| Town/city                                                  | 2,219 | 63.2% |
| <b>Municipal/city district standard of living tertile:</b> |       |       |
| Low                                                        | 956   | 27.2% |
| Medium                                                     | 1,394 | 39.7% |
| High                                                       | 1,162 | 33.1% |

1  
2  
3 The MyLife core QL cohort comprises a total of 120 middle-school students (boys  $n =$   
4 58 and girls  $n = 62$ ) from six schools/classes with valid parental consent, who are invited to  
5  
6 each of the five rounds of qualitative interviews. To ensure identification of potential regional  
7  
8 and demographic differences, the schools were selected across Norway (two each from the  
9  
10 South-East, Northern, and Western region), and both urban and suburban schools were  
11  
12 recruited within each region (see Figure 2).  
13  
14  
15  
16

## 17 18 DATA COLLECTION

### 19 20 21 Pilot study

22  
23 A small scale mixed-methods pilot study including four middle schools and one high  
24  
25 school ( $n = 851$ ) was conducted in 2014 to test recruitment strategies, modes of data  
26  
27 collection, and questionnaires items. This has been described in detail elsewhere (51, 52). The  
28  
29 QL arm of the pilot study included two 8<sup>th</sup> grade classes ( $n = 36$ ), and also tested recruitment  
30  
31 strategies, interview guides, and interviewing techniques (38, 53). The experiences from the  
32  
33 pilot study also informed the main study decisions related to the adjustments of time intervals  
34  
35 between interviews, the balance between individual and group interviews, and group size and  
36  
37 composition. One of the classes ( $n = 13$ ) continued participation after the pilot, and is included  
38  
39 in the hereby described core qualitative MyLife sample ( $n = 120$ ) even though its baseline was  
40  
41 completed ahead of the main study schedule.  
42  
43  
44  
45  
46  
47  
48

### 49 The first QT wave in the 2017 fall semester (MyLife baseline)

50  
51 During the first wave of QT data collection the entire cohort of 3,512 students was  
52  
53 invited to complete a 30-minute electronically-administered questionnaire during a regular  
54  
55 school period. A contact person at each school received 1,000 Norwegian Kroner (about 100  
56  
57  
58  
59  
60

1  
2  
3 Euros) as compensation for assisting with data collection, while each participating class  
4  
5 received the same amount into their class' saving account.  
6  
7

8 All but one of the 33 recruited schools managed to organize data collection. Due to this  
9  
10 one withdrawn school ( $n_{\text{enrolled}} = 65$ ), a total of 3,447 instead of the eligible 3,512 students  
11  
12 were invited to take part in the baseline assessment (see Figure 3 also). Teachers supervised  
13  
14 data collection during class time, by reading aloud a standardized MyLife study guide  
15  
16 describing the purpose of the study, assent, and confidentiality, providing practical  
17  
18 information about accessing the on-line questionnaire, and reminding students that they are  
19  
20 always free to decline participation or withdraw from the study altogether (including  
21  
22 information collected about them deleted). Students were instructed to type in a Uniform  
23  
24 Resource Locator (URL) in their web-browsers, which gave them access to the MyLife on-line  
25  
26 questionnaire. Students without parental consent were instructed to do schoolwork for the  
27  
28 duration of the class.  
29  
30  
31  
32  
33  
34  
35

36 The questionnaire contained questions about a wide range of themes, with a particular  
37  
38 focus on family background, leisure time activities, personal characteristics, and substance  
39  
40 use. A summary of the baseline master questionnaire is presented in Table 2. The  
41  
42 questionnaire contained enough contact details to allow identification in the Norwegian  
43  
44 population registry. After removing questionnaires with insufficient contact information and  
45  
46 duplicates, a total of 2,975 valid responses remained, yielding a response rate of 85%. For 8<sup>th</sup>,  
47  
48 9<sup>th</sup>, and 10<sup>th</sup> graders, the response rate was 88%, 81%, and 85% respectively.  
49  
50  
51  
52  
53  
54  
55  
56  
57  
58  
59  
60

**Table 2.**  
**Brief overview of topics encompassed in the MyLife QT adolescent baseline questionnaire (2017)**

| Topic                             | Items                                                                                                                                                                                                                                                                                                                     |
|-----------------------------------|---------------------------------------------------------------------------------------------------------------------------------------------------------------------------------------------------------------------------------------------------------------------------------------------------------------------------|
| Socio-demographic characteristics | Gender; birthdate; school and county; grade; residence; household composition; immigrant status; parental SES (employment and educations); religious affiliation; perceived SES; income                                                                                                                                   |
| Parent-child relationships        | Parental knowledge of child's leisure time; discipline; frequency of breaking rules; consequences of breaking rules; feel safe at home                                                                                                                                                                                    |
| Risk and protective factors       | Stress/Negative life events; leisure time activities; unsupervised leisure time; sports/music/hobbies involvement; social media and videogames; gambling; personality and temperamental traits; delinquency                                                                                                               |
| School and peer experiences       | Truancy; school connectedness; core GPA last semester; plans for further education; close friendships; popularity among peers; victimization and mobbing experiences; boyfriends/girlfriends history; boyfriend/girlfriend use of tobacco, alcohol and cannabis.                                                          |
| Health and diet                   | Pubertal timing; physical and learning disabilities; self-rated physical health; soft-drinks and energy drinks intake; use of painkillers; injury; violence; depression symptoms                                                                                                                                          |
| Alcohol                           | Exposure to drinking opportunities; alcohol use, and alcohol intoxication, and episodic heavy drinking histories; initiation age; usual alcohol quantity; drinking with parents; received alcohol from parents; witnessing of parental intoxication; alcohol expectancies; perceived harmfulness; legalization attitudes. |
| Tobacco                           | Cigarettes, snus and e-cigarette use histories; initiation age; last time used; usual quantity/day; place of purchase; beliefs about cigarette smoking; witnessing of parental cigarette and snus use; perceived harmfulness; legalization attitudes.                                                                     |
| Cannabis                          | Exposure to cannabis use opportunities; cannabis use history; initiation age; willingness to trying cannabis; perceived cannabis availability; cannabis use expectancies; perceived harmfulness; legalization opinions.                                                                                                   |
| Other substances                  | Synthetic cannabinoids; MDMA; Amphetamines; Cocaine; Prescription medications.                                                                                                                                                                                                                                            |



### The second QT wave in the fall of 2018 (1<sup>st</sup> FUP)

By the 2018 Fall semester, students who were in 10<sup>th</sup> grade at study entry in 2017 had graduated middle school and most had entered high-school. For those who were still in middle school (2,515 students) the data collection procedure was the same as at baseline, with the exception that they were handed a secure note with a unique pre-assigned PIN-code to enter in the questionnaire, instead of typing in all their contact details.

Those who had left middle-school ( $n = 997$ ) could no longer be assessed in structured school settings, and were approached in a different way. First, a news-letter with updated information about the MyLife study and information about the upcoming round of data collection was mailed to their home addresses. Shortly after, an e-mail invitation with a link to the questionnaire was sent to each student, including the information that each participant would receive a 200 Norwegian Kroner gift card (about 20 Euros). Three reminders were sent to non-responders via e-mail and SMS. The questionnaire was completed by 2,857 adolescents, i.e., 81% of the cohort. For the 9<sup>th</sup> and 10<sup>th</sup> graders who again completed questionnaires in school, the response rate was 85.4% and 84.4% respectively. For those who were 10<sup>th</sup> graders in 2017 and who were approached outside of school, the response rate was 72.3%.

Out of the entire QT cohort (3,512 adolescents), 5.5% had not participated in 2017 or in 2018 ( $n = 194$ ); 13.1% ( $n = 461$ ) had participated only in 2017; and 9.8% ( $n = 343$ ) had participated only in 2018. A total of 71.6 % ( $n = 2,514$ ) had participated both in 2017 and in 2018.

### **The QT parental questionnaire in the 2017 Fall semester**

A total of 3,035 parents had consented to their own participation in the study. Of these, 2,918 were invited to take part in the study, and 117 were not invited because of incomplete contact information (see Figure 3). In late 2017, all parents received an e-mail with a link to a questionnaire that took about 15 minutes to complete. The contents of the questionnaire are summarized in Table 3. The questionnaire contained questions about the parent who completed the questionnaire (the mother in 79% of cases) and, if relevant, the other parent in the household, and questions about their child or children who participated in the MyLife study. Parents were not reimbursed. Two reminder e-mails were sent to non-responders, and by the end of the data collection in December 2017, 1,899 parents had completed the questionnaire. A total of 276 parents had two children who participated in the study, and two parents had three children who participated in the study. Therefore, parents of a total of 2,041 children completed parental questionnaires.

### **The qualitative arm (QL)**

The first wave of QL data collection was initiated in 2015, in addition to one class which completed baseline interviews as part of the pilot study in 2014 (see Figure 4). This translated into a total of six 8<sup>th</sup> grade classes from six schools ( $n = 118$  students). All baseline interviews were conducted as group interviews of approximately 45 minutes duration; a total of 26 interview sessions were completed. All newly recruited classes were recruited from schools that also consented for participation in the QT arm. However, even though the selected schools/classes participated in both QT and QL MyLife study arms, it is currently not possible to identify and cross-link individual participants.

1  
2  
3  
4  
5  
6  
7  
8  
9  
10  
11  
12  
13  
14  
15  
16  
17  
18  
19  
20  
21  
22  
23  
24  
25  
26  
27  
28  
29  
30  
31  
32  
33  
34  
35  
36  
37  
38  
39  
40  
41  
42  
43  
44  
45  
46

**Table 3.**  
**Brief overview of areas encompassed in the MyLife QT parental baseline questionnaire (2017)**

| Topic                                       | Items                                                                                                                                                                                                          |
|---------------------------------------------|----------------------------------------------------------------------------------------------------------------------------------------------------------------------------------------------------------------|
| <b>Information reported about self</b>      |                                                                                                                                                                                                                |
| Socio-demographic characteristics           | Gender; date of birth; household composition; own and partner’s education; own and partner’s employment status; household income; home ownership; perceived SES                                                |
| Risk and protective factors                 | Self-rated physical and mental health; relationship satisfaction; agreement re: important decisions; agreement re: childrearing; negative life events; personality                                             |
| Substance use                               | Tobacco, snus, alcohol, and cannabis use histories; drinking with child(ren) present; house rules about smoking; legalization opinions; knowledge of and attitudes towards child(ren)’s possible substance use |
| <b>Information reported about the child</b> |                                                                                                                                                                                                                |
| Socio-demographic characteristics           | Gender; date of birth; twin status; nature of relationship with child                                                                                                                                          |
| Child characteristics                       | Learning and physical disabilities; temperament; conduct problems                                                                                                                                              |
| Parent-child relationships                  | Parental knowledge of child's leisure time; discipline; frequency of breaking rules; consequences of breaking rules                                                                                            |
| School and peer experiences                 | Interacting with other parents at school; knowing other children at school                                                                                                                                     |

1  
2  
3 The first follow-up (Time 2; 2017 Fall semester) was conducted when students were in  
4 the 10<sup>th</sup> grade as group interviews similar to the baseline. Interviews were conducted in  
5 smaller groups of 4-6 students each; a total of 24 group interviews were conducted with 85  
6 students. The first follow up with the pilot class was conducted in the 2015 Spring semester  
7 (8<sup>th</sup> graders,  $n = 13$ ) hence it is not comparable to other Time 2 interviews. The second follow-  
8 up was conducted during the second semester of 10<sup>th</sup> grade (Time 3; 2018 Spring; 2017 for  
9 the pilot class). These were individual interviews; a total of 95 interviews of approximately 40  
10 minutes duration were conducted during regular school hours.  
11  
12  
13  
14  
15  
16  
17  
18  
19  
20  
21  
22

## 23 FINDINGS TO DATE

### 24 QT

25  
26 Descriptive statistics for selected demographic and substance use variables for  
27 adolescent QT baseline are presented in Table 4. The majority of responders were born in  
28 Norway, and had parents who lived together. Only a handful of parents (7.2% of mothers and  
29 4.1% of fathers) were reported as unemployed. In terms of subjective social status, most  
30 ranked their family highly compared to others in their neighborhood. The gender differences  
31 in demographic variables were quite small, but boys had a higher mean score on subjective  
32 social status compared to girls.  
33  
34  
35  
36  
37  
38  
39  
40  
41  
42  
43  
44  
45

46 About one in six had consumed alcohol in their lifetimes, but only one in sixteen had  
47 consumed alcohol in the last 30 days. A little over a third of the nine percent who had ever  
48 tried snus had also used snus in the last 30 days. This was also the case for cigarette smoking  
49 – most of those who had ever tried smoking had not smoked a cigarette in the last 30 days.  
50  
51 Only about one percent had tried cannabis, and less than one percent had tried other illicit  
52 drugs. There were some gender differences in substance use. Significantly more boys than  
53  
54  
55  
56  
57  
58  
59  
60

girls had tried snus, cigarettes and cannabis, but there were no gender differences in alcohol consumption, snus use, and cigarette smoking in the last 30 days.

**Table 4.**  
**MyLife core QT cohort demographic and key behavioral characteristics at baseline (N = 2,975)**

|                                                          | Total<br>(N= 2,975) | Girls<br>(n = 1,668) | Boys<br>(n = 1,307) |
|----------------------------------------------------------|---------------------|----------------------|---------------------|
| <b>Demographic variables</b>                             |                     |                      |                     |
| Age                                                      | 13.9 (0.82)         | 13.9 (0.81)          | 13.9 (0.83)         |
| Born in Norway                                           | 93.4%               | 93.5%                | 93.3%               |
| Parents live together                                    | 72.1%               | 71.1%                | 73.4%               |
| Mother employed:                                         |                     |                      |                     |
| Yes                                                      | 90.1%               | 90.6%                | 89.4%               |
| No                                                       | 7.2%                | 6.8%                 | 7.6%                |
| Unknown                                                  | 2.8%                | 2.6%                 | 3.0%                |
| Father employed:                                         |                     |                      |                     |
| Yes                                                      | 92.5%               | 92.4%                | 92.5%               |
| No                                                       | 4.1%                | 4.4%                 | 3.8%                |
| Unknown                                                  | 3.4%                | 3.2%                 | 3.7%                |
| Subjective social status (1 = worst off, 10 = best off)* | 7.29 (1.72)         | 7.19 (1.68)          | 7.41 (1.76)         |
| <b>Substance use</b>                                     |                     |                      |                     |
| Ever consumed alcohol                                    | 15.7%               | 15.3%                | 16.3%               |
| Consumed alcohol in the last 30 days                     | 6.1%                | 6.5%                 | 5.6%                |
| Ever tried snus*                                         | 8.9%                | 7.4%                 | 10.8%               |
| Used snus in the last 30 days                            | 3.6%                | 3.0%                 | 4.3%                |
| Ever tried a cigarette*                                  | 8.6%                | 7.11%                | 10.5%               |
| Smoked a cigarette in the last 30 days                   | 3.0%                | 2.7%                 | 3.4%                |
| Tried cannabis*                                          | 1.3%                | 0.7%                 | 2.0%                |
| Tried other illicit drug                                 | 0.9%                | 0.7%                 | 1.1%                |

Note:

*t*-tests performed for continuous variables and  $\chi^2$ -tests for categorical variables to assess gender differences.

\* denotes statistically significant gender difference at the  $p < 0.05$  level.

Table 5 shows substance use in 2017 and 2018 for respondents at both time points to assess stability in use as well as the rate of starters and quitters. By 2018 a large majority had still never consumed alcohol, used snus, smoked cigarettes, or used cannabis. However, more than one fifth of the respondents started to drink alcohol during this time period. Substantially fewer initiated use of snus (7.2%), cigarettes (4.8%), and cannabis (2.8%). In the same time period, less than two percent stopped drinking alcohol, about four percent stopped using snus, one percent stopped smoking cigarettes, and less than half a percent stopped using cannabis.

**Table 5.**  
**Current substance use in 2017 and 2018 for those who participated in both QT waves, N = 2,514**

| Current use of: | Never | Only in 2017 | Only in 2018 | In 2017 and 2018 |
|-----------------|-------|--------------|--------------|------------------|
| Alcohol         | 66.7% | 1.6%         | 23.2%        | 8.5%             |
| Snus            | 86.7% | 2.6%         | 7.2%         | 3.5%             |
| Cigarette       | 92.7% | 1.4%         | 4.8%         | 1.2%             |
| Cannabis        | 96.1% | 0.4%         | 2.8%         | 0.7%             |

*Note:*

Current use = used at least once in the last 12 months

## QL

Pilot study interviews indicated that the, at that time, 12-13 year old participants were highly skeptical of drinking. They believed that young people drink because they want to be cool, because they are miserable, or because of group pressure. The results were interpreted as reflecting a deep-rooted cultural ambivalence towards alcohol use in Norway (62), also suggesting that boundaries between 'adolescents' and 'adults' are fundamental when understanding emerging adolescent social identities, especially when it comes to drinking and drinking culture (53).

1  
2  
3 Preliminary analysis of the main study interviews suggest a normalization of non-  
4 drinking among 15-16 year olds, and continued ambivalence in their perceptions of alcohol  
5 use. While cigarette smoking was very uncommon, snus use was more common and socially  
6 accepted, and e-cigarettes seem to have some novelty value. Overall, substance use appeared  
7 not to be at the core of many adolescents' self-image, which often centered on school  
8 performance, sports/exercise, and ambitions for the future. However, some individual  
9 trajectories highlight vulnerability that may point towards future problem use of alcohol  
10 and/or illegal substances.  
11  
12  
13  
14  
15  
16  
17  
18  
19  
20  
21  
22

### 23 **Future plans**

24  
25 Both QT and QL MyLife study arms have planned individual adolescent follow-ups  
26 through 2021 (see Figure 1). Specifically, three more QT annual rounds are scheduled for 2019,  
27 2020, and 2021. The planned procedures and data collection strategies are identical as for the  
28 2018, but after 2019 the entire cohort – having graduated middle school – will have to be  
29 contacted individually. QL follow-ups will be conducted as individual interviews, specifically  
30 during the spring of 2019, when the students will be in the first year of high school, and spring  
31 2021, when the students will in the last year in high school. All interviews will be conducted  
32 by the trained research staff and MyLife team members at the Norwegian Institute of Public  
33 Health as before.  
34  
35  
36  
37  
38  
39  
40  
41  
42  
43  
44  
45  
46  
47

48 Norway has rich information about each of its municipalities, particularly indicators of  
49 socio-economic status such as the unemployment rate, income disparity, and educational  
50 level. Such municipal level variables can be linked to the quantitative data and be included in  
51 multilevel analysis to explore more complex person-environment interaction hypotheses.  
52  
53  
54  
55  
56  
57  
58  
59  
60

1  
2  
3 Finally, parental consent was obtained for individual-level linkages of questionnaire  
4 data to the national-level administrative sources of data, such as health, education, and labor  
5 and social registries (48-50). These registries can provide additional information on putative  
6 risk exposures, as well as on the range of long-term outcomes for MyLife adolescents through  
7 continually and prospectively updated registry records. Registry linkages will be made for all  
8 cohort members, including parents, following appropriate permissions from the Norwegian  
9 Regional Committee for Medical and Health Research Ethics.  
10  
11  
12  
13  
14  
15  
16  
17  
18  
19  
20

### 21 **STRENGTHS AND LIMITATIONS**

22  
23 To the best of our knowledge, the MyLife study is the very first longitudinal study of  
24 youth in Norway to employ a quantitative developmental epidemiology perspective in  
25 combination with qualitative individual and group interviewing, and to encompass a high  
26 number (5) of meaningfully spaced (annual) assessments focusing specifically on behavioral  
27 development and substance use trajectories over the critical adolescent years. The MyLife  
28 study aims to integrate multiple sources of data, multiple informants, and multiple  
29 methodologies. In that respect, the study will significantly a) extend and augment the  
30 knowledge of adolescent behavioral health in general, and of substance use in particular  
31 gained by previous studies, b) substantively contribute to both national and international  
32 research, and c) inform public health policy.  
33  
34  
35  
36  
37  
38  
39  
40  
41  
42  
43  
44  
45  
46  
47

48 As with all studies, there are important limitations that should be noted. Because of  
49 the reasonable privacy and confidentiality issues, the participating schools were not able to  
50 share parental contact info, thus precluding the MyLife team from directly contacting the  
51 parents with study information and consent forms. For this reason, distribution of the project  
52 information booklets and consent letters was outsourced to schools and students themselves,  
53  
54  
55  
56  
57  
58  
59  
60



1  
2  
3 where the students were asked to share the MyLife study information with their parents and  
4  
5 to return sealed envelopes with completed consent forms to their teachers. While close to  
6  
7 7,000 information packages were distributed to the participating schools to match their  
8  
9 official enrollment, a total, 4,195 valid consent forms were returned, and 2,756 were not  
10  
11 returned. It is not known, however, how many of the MyLife booklets actually reached the  
12  
13 parents, given the reliance on students themselves as liaisons. This suggests that the consent  
14  
15 strategy, albeit the only one legally and ethically feasible, might have been less than optimal.  
16  
17  
18  
19

20  
21 The related limitation concerns non-random sampling and implications for inferences  
22  
23 and generalizability. First and foremost, it should be noted that the aim of the MyLife study is  
24  
25 not to estimate national prevalence rates or to draw related inferences. Large-scale national  
26  
27 monitoring efforts, such as the ESPAD (63), are far more appropriate when population-level  
28  
29 estimates and population-level generalizability are of primary interest. Rather, MyLife aims to  
30  
31 draw inferences about the prospective associations between the risk and protective factors,  
32  
33 especially over time. When such estimates are of interest, population-representative samples  
34  
35 are not required, given appropriate control for confounding and avoidance of other biases  
36  
37 (64). Further, an unanticipated benefit of the moderate consent rate may be that the study is  
38  
39 not as prone to attrition over time as longitudinal studies that start off with representative  
40  
41 samples but lose a substantial proportion of participants over time. Indeed, we have reasons  
42  
43 to expect low attrition in the next three rounds of QT data collection because of the high  
44  
45 response rate in the second round, which may be indicative of the high commitment to and  
46  
47 identification with the study. Similarly, QL retention rates remained strong throughout the  
48  
49 follow-ups so far, despite the relatively demanding individual interviews. A major criticism of  
50  
51 longitudinal studies with non-representative samples is that they lack heterogeneity (65). In  
52  
53 our case, ensuring representation of adolescents from different geographical areas and  
54  
55  
56  
57  
58  
59  
60

1  
2  
3 different socio-economic areas supports greater cohort heterogeneity than would have been  
4  
5  
6 obtained through the simple random sampling.  
7  
8  
9  
10  
11  
12  
13  
14  
15  
16  
17  
18  
19  
20  
21  
22  
23  
24  
25  
26  
27  
28  
29  
30  
31  
32  
33  
34  
35  
36  
37  
38  
39  
40  
41  
42  
43  
44  
45  
46  
47  
48  
49  
50  
51  
52  
53  
54  
55  
56  
57  
58  
59  
60

For peer review only

1  
2  
3 **Acknowledgements:** We thank all participating students and their families, as well as all the  
4 schools and teachers who assisted with the MyLife data collection. The authors would like to  
5  
6 acknowledge the important contributions to the MyLife study made by the following  
7  
8 individuals: Camilla Stub Lundberg, Mads Toftgaard, Silje Bakken, Øystein Skjælaaen, Skule  
9  
10 Wigenstad, Marie Svendsen Nerheim, and Tilmann von Soest.  
11  
12

13  
14  
15 **Contributors:** GSB and JBA drafted the manuscript, with substantive contributions from JS, RT,  
16  
17 and KB. JBA, EK, and GSB designed and established the Quantitative arm of the MyLife study,  
18  
19 while JS and RT designed and started the Qualitative arm. JBA, GSB, and JS remain responsible  
20  
21 for the scientific direction and continued management of the project as a whole, with the  
22  
23 assistance from EK, RT and KB. All authors reviewed, critically revised, and approved the  
24  
25 manuscript.  
26  
27  
28

29  
30  
31 **Funding** The MyLife project was funded by the Norwegian Institute of Alcohol and Drug  
32  
33 Research from 2014 to 2015, and is currently funded by the Norwegian Institute of Public  
34  
35 Health from 2016 after the two institutions merged.  
36  
37  
38

39 **Competing interests:** None.  
40

41 **Participants' consent for publication:** Obtained.  
42

43  
44 **Ethics approval:** The MyLife study received approval by the Norwegian Data Inspectorate  
45  
46 (reference no.: 15/01495) after ethical evaluation by The National Committee for Research  
47  
48 Ethics in the Social Sciences and the Humanities (reference no.: 2016/137). All participants  
49  
50 were fully informed about the study, and provided paper-and-pencil informed parental  
51  
52 consent and electronic assent following parental consent. Participation is entirely voluntary  
53  
54 and participants are free to withdraw at any time.  
55  
56  
57

58  
59 **Provenance and peer review:** N/A.  
60

1  
2  
3 **Data sharing statement:** Researchers interested in collaboration are both welcomed and  
4  
5 invited to propose research projects by contacting the MyLife team. The MyLife dataset is  
6  
7 administrated by the NIPH.  
8  
9

10  
11 **Open access:** This is an open access article distributed in accordance with the Creative  
12  
13 Commons Attribution Non Commercial (CC BY-NC 4.0) license, which permits others to  
14  
15 distribute, remix, adapt, build upon this work non-commercially, and license their derivative  
16  
17 works on different terms, provided the original work is properly cited, appropriate credit is  
18  
19 given, any changes made indicated, and the use is non-commercial. See:  
20  
21 <http://creativecommons.org/licenses/by-nc/4.0/>  
22  
23  
24  
25  
26  
27  
28  
29  
30  
31  
32  
33  
34  
35  
36  
37  
38  
39  
40  
41  
42  
43  
44  
45  
46  
47  
48  
49  
50  
51  
52  
53  
54  
55  
56  
57  
58  
59  
60

## REFERENCES

1. Pape H, Rossow I, Brunborg GS. Adolescents drink less: How, who and why? A review of the recent research literature. *Drug and alcohol review*. 2018;37:S98-S114.
2. Looze Md, Bogt Tt, Vollebergh W, Pfortner T-K, Vieno A, Pickett W, et al. Decreases in adolescent weekly alcohol use in Europe and North America: evidence from 28 countries from 2002 to 2010. *European Journal of Public Health*. 2015;25(suppl\_2):69-72.
3. ESPAD Group European Monitoring Centre for Drugs and Drug Addiction. ESPAD Report 2015: Results from the European School Survey Project on Alcohol and Other Drugs. 2016.
4. Levy S, Campbell MD, Shea CL, DuPont R. Trends in Abstaining From Substance Use in Adolescents: 1975–2014. *Pediatrics*. 2018;142(2):e20173498.
5. Aarons GA, Brown SA, Coe MT, Myers MG, Garland AF, Ezzet-Lofstram R, et al. Adolescent alcohol and drug abuse and health. *Journal of Adolescent Health*. 1999;24(6):412-21.
6. U.S. Department of Health and Human Services OotSG. The Surgeon General’s Call to Action To Prevent and Reduce Underage Drinking. 2007.
7. Gruber SA, Sagar KA, Dahlgren MK, Racine M, Lukas SE. Age of onset of marijuana use and executive function. *Psychology of Addictive Behaviors*. 2012;26(3):496-506.
8. Institute for Health Metrics and Evaluation. GBD Compare Seattle, WA: IHME, University of Washington; 2018 [Available from: <http://vizhub.healthdata.org/gbd-compare>].
9. Anthony JC, Petronis KR. Early-onset drug use and risk of later drug problems. *Drug and alcohol dependence*. 1995;40(1):9-15.
10. Ennett ST, Foshee VA, Bauman KE, Hussong A, Cai L, Reyes HLM, et al. The social ecology of adolescent alcohol misuse. *Child development*. 2008;79(6):1777-91.
11. Sloboda Z, Glantz MD, Tarter RE. Revisiting the concepts of risk and protective factors for understanding the etiology and development of substance use and substance use disorders: Implications for prevention. *Substance Use & Misuse*. 2012;47(8-9):944-62.
12. Hawkins JD, Catalano RF, Miller JY. Risk and protective factors for alcohol and other drug problems in adolescence and early adulthood: Implications for substance abuse prevention. *Psychological Bulletin*. 1992;112(1):64-105.
13. Connell CM, Gilreath TD, Aklin WM, Brex RA. Social-ecological influences on patterns of substance use among non-metropolitan high school students. *American journal of community psychology*. 2010;45(1-2):36-48.
14. Olson JS, Crosnoe R. The Interplay of Peer, Parent, and Adolescent Drinking. *Social science quarterly*. 2018;99(4):1349-62.
15. Brown EC, Graham JW, Hawkins JD, Arthur MW, Baldwin MM, Oesterle S, et al. Design and analysis of the Community Youth Development Study longitudinal cohort sample. *Evaluation Review*. 2009;33(4):311-34.
16. Chassin L, Pitts SC, Prost J. Binge drinking trajectories from adolescence to emerging adulthood in a high-risk sample: Predictors and substance abuse outcomes. *Journal of Consulting and Clinical Psychology*. 2002;70(1):67-78.
17. Jackson KM, Sher KJ, Cooper ML, Wood PK. Adolescent alcohol and tobacco use: onset, persistence and trajectories of use across two samples. *Addiction*. 2002;97(5):517-31.
18. Jackson KM, Sher KJ, Schulenberg JE. Conjoint developmental trajectories of young adult substance use. *Alcoholism*. 2008;32(5):723-37.
19. Orlando M, Tucker JS, Ellickson PL, Klein DJ. Concurrent use of alcohol and cigarettes from adolescence to young adulthood: An examination of developmental trajectories and outcome. *Substance Use and Misuse*. 2005;40:1051-69.
20. Patton GC, Coffey C, Lynskey MT, Reid S, Hemphill S, Carlin JB, et al. Trajectories of adolescent alcohol and cannabis use into young adulthood. *Addiction*. 2007;102(4):607-15.
21. Swift W, Coffey C, Carlin JB, Degenhardt L, Patton GC. Adolescent cannabis users at 24 years: Trajectories to regular weekly use and dependence in young adulthood. *Addiction*. 2008;103(8):1361-70.

22. Fergusson DM, Horwood LJ, Boden JM, Jenkin G. Childhood social disadvantage and smoking in adulthood: Results of a 25-year longitudinal study. *Addiction*. 2007;102(3):475-82.
23. Fothergill KE, Ensminger ME. Childhood and adolescent antecedents of drug and alcohol problems: A longitudinal study. *Drug and alcohol dependence*. 2006;82(1):61-76.
24. Hser YI, Longshore D, Anglin MD. The life course perspective on drug use: a conceptual framework for understanding drug use trajectories. *Eval Rev*. 2007;31(6):515-47.
25. Atherton OE, Conger RD, Ferrer E, Robins RW. Risk and Protective Factors for Early Substance Use Initiation: A Longitudinal Study of Mexican-Origin Youth. *Journal of research on adolescence : the official journal of the Society for Research on Adolescence*. 2016;26(4):864-79.
26. Guo J, Collins LM, Hill KG, Hawkins JD. Developmental pathways to alcohol abuse and dependence in young adulthood. *J Stud Alcohol*. 2000;61(6):799-808.
27. Tucker JS, Ellickson PL, Orlando M, Martino SC, Klein DJ. Substance use trajectories from early adolescence to emerging adulthood: A comparison of smoking, binge drinking, and marijuana use. *Journal of Drug Issues*. 2005;35(2):307-32.
28. Costello EJ, Angold AC. Developmental Epidemiology. In: Sameroff AJ, Lewis M, Miller SM, editors. *Handbook of Developmental Psychopathology*. Boston, MA: Springer US; 2000. p. 57-73.
29. Glantz MD, Leshner AI. Drug abuse and developmental psychopathology. *Development and psychopathology*. 2000;12(4):795-814.
30. Chassin L, Sher KJ, Hussong A, Curran P. The developmental psychopathology of alcohol use and alcohol disorders: research achievements and future directions. *Development and psychopathology*. 2013;25(4 Pt 2):1567-84.
31. Erevik EK, Pallesen S, Vedaa Ø, Andreassen CS, Torsheim T. Alcohol use among Norwegian students: Demographics, personality and psychological health correlates of drinking patterns. *Nordic Studies on Alcohol and Drugs*. 2017;34(5):415-29.
32. Burdzovic Andreas J, Pape H. Who receives cannabis use offers: A general population study of adolescents. *Drug and alcohol dependence*. 2015;156:150-6.
33. Pape H, Norström T, Rossow I. Adolescent drinking—a touch of social class? *Addiction*. 2017;112(5):792-800.
34. Burdzovic Andreas J, Pape H, Bretteville-Jensen AL. Who are the adolescents saying "No" to cannabis offers. *Drug and alcohol dependence*. 2016;163:64-70.
35. Burdzovic Andreas J, Bretteville-Jensen AL. Ready, willing, and able: The role of cannabis use opportunities in understanding adolescent cannabis use. *Addiction*. 2017;112:1973-82.
36. Pape H, Bye EK. Drinking with parents: Different measures, different associations with underage heavy drinking? *Nordic Studies on Alcohol and Drugs*. 2017;34(6):445-55.
37. Pape H, Rossow I, Storvoll EE. Under double influence: Assessment of simultaneous alcohol and cannabis use in general youth populations. *Drug and alcohol dependence*. 2009;101(1-2):69-73.
38. Sandberg S, Skjælaaen Ø. "Shoes on your hands": perceptions of alcohol among young adolescents in Norway. *Drugs: Education, Prevention and Policy*. 2018;25(6):449-56.
39. Strandheim A, Holmen TL, Coombes L, Bentzen N. Alcohol intoxication and mental health among adolescents—a population review of 8983 young people, 13-19 years in North-Trøndelag, Norway: the Young-HUNT Study. *Child and adolescent psychiatry and mental health*. 2009;3(1):18.
40. Strand N, von Soest T. Young in Norway – Longitudinal. Documentation of design, variables, and scales. Oslo: NOVA – Norwegian Social Research; 2007.
41. Brunborg GS, Norström T, Storvoll EE. Latent developmental trajectories of episodic heavy drinking from adolescence to early adulthood: Predictors of trajectory groups and alcohol problems in early adulthood as outcome. *Drug and Alcohol Review*. 2018;37(3):389-95.
42. Nilsen W, Kjeldsen A, Karevold EB, Skipstein A, Sand Helland M, Gustavson K, et al. Cohort Profile: The Tracking Opportunities and Problems Study (TOPP)—study of Norwegian children and their parents followed from infancy to early adulthood. *International journal of epidemiology*. 2017;46(5):1399-g.

- 1
- 2
- 3 43. Enstad F, Pedersen W, Nilsen W, von Soest T. Predicting early onset of intoxication versus
- 4 drinking—A population-based prospective study of Norwegian adolescents. *Addictive behaviors*
- 5 reports. 2017;6:1-7.
- 6 44. Bauman KE, Ennett ST, Foshee VA, Hussong A, Faris R, Hipp JR, et al. A social contextual analysis
- 7 of youth cigarette smoking development. *Nicotine & Tobacco Research*. 2010;12(9):950-62.
- 8 45. Bronfenbrenner U. Toward an experimental ecology of human development. *American*
- 9 *Psychologist*. 1977;32(7):513-31.
- 10 46. Galea S, Nandi A, Vlahov D. The social epidemiology of substance use. *Epidemiologic Reviews*.
- 11 2004;26:36-52.
- 12 47. Thomas YF. The social epidemiology of drug abuse. *Am J Prev Med*. 2007;32(6):S141-S6.
- 13 48. Furu K. Establishment of the nationwide Norwegian Prescription Database (NorPD)—new
- 14 opportunities for research in pharmacoepidemiology in Norway. *Norsk epidemiologi*. 2008;18(2).
- 15 49. Irgens LM. The Medical Birth Registry of Norway. Epidemiological research and surveillance
- 16 throughout 30 years. *Acta Obstetrica et Gynecologica Scandinavica: SPECIAL ISSUE REVIEW*.
- 17 2000;79(6):435-9.
- 18 50. De Ridder KA, Pape K, Johnsen R, Westin S, Holmen TL, Bjørngaard JH. School dropout: a major
- 19 public health challenge: a 10-year prospective study on medical and non-medical social insurance
- 20 benefits in young adulthood, the Young-HUNT 1 Study (Norway). *J Epidemiol Community Health*.
- 21 2012;66(11):995-1000.
- 22 51. Brunborg GS, Andreas JB, Kvaavik E. Social media use and episodic heavy drinking among
- 23 adolescents. *Psychological reports*. 2017;120(3):475-90.
- 24 52. Burdzovic Andreas J, Brunborg GS. Depressive symptomatology among Norwegian adolescent
- 25 boys and girls: the patient health Questionnaire-9 (PHQ-9) psychometric properties and correlates.
- 26 *Frontiers in psychology*. 2017;8:887.
- 27 53. Bakken SA, Sandøy TA, Sandberg S. Social identity and alcohol in young adolescence: The
- 28 perceived difference between youthful and adult drinking. *Journal of youth studies*. 2017;20(10):1380-
- 29 95.
- 30 54. Lundberg CS, Kvaavik E, Tokle R. Nye bruksmønstre i et tobakksmarked i endring—kombinert
- 31 bruk av sigaretter, snus og e-sigaretter blant ungdom. *Nordic Studies on Alcohol and Drugs*.
- 32 2018:1455072518797823.
- 33 55. Bell RQ. Convergence: An accelerated longitudinal approach. *Child Development*.
- 34 1953;24(2):145-52.
- 35 56. Duncan SC, Duncan TE, Hops H. Analysis of longitudinal data within accelerated longitudinal
- 36 designs. *Psychological Methods*. 1996;1(3):236-48.
- 37 57. Galbraith S, Bowden J, Mander A. Accelerated longitudinal designs: An overview of modelling,
- 38 power, costs and handling missing data. *Statistical Methods in Medical Research*. 2014.
- 39 58. Thomson R, Holland J. Hindsight, foresight and insight: the challenges of longitudinal
- 40 qualitative research. *International Journal of Social Research Methodology*. 2003;6(3):233-44.
- 41 59. Yates L, McLeod J. 12 to 18: A qualitative longitudinal study of students, values and difference
- 42 in Australian schools. Deakin West ACT: Australian Curriculum Studies Association; 2007.
- 43 60. The Human Development Report 2010 Team. Human development report 2010, 20th
- 44 anniversary edition: The real wealth of nations, pathways to human development. New York, NY:
- 45 United Nations Development Programme; 2010.
- 46 61. Rogstad L. Indeks for levekårsproblemer. *Samfunnsspeilet*. 2002;16:106-8.
- 47 62. Sandberg S, Skjælaaen Ø. "Shoes on your hands": perceptions of alcohol among young
- 48 adolescents in Norway. *Drugs: Education, Prevention and Policy*. 25(6):449-56.
- 49 63. Kraus L, Nociar A. ESPAD report 2015: results from the European school survey project on
- 50 alcohol and other drugs: European Monitoring Centre for Drugs and Drug Addiction; 2016.
- 51 64. Rothman KJ, Gallacher JE, Hatch EE. Why representativeness should be avoided. *International*
- 52 *journal of epidemiology*. 2013;42(4):1012-4.
- 53 65. Richiardi L, Pizzi C, Pearce N. Commentary: Representativeness is usually not necessary and
- 54 often should be avoided. *International journal of epidemiology*. 2013;42(4):1018-22.
- 55
- 56
- 57
- 58
- 59
- 60

## FIGURE CAPTIONS

1  
2  
3  
4  
5  
6  
7  
8  
9 **Figure 1.**  
10 **MyLife study design, data sources, and planned assessments.**  
11

12  
13 **Figure 2.**  
14 **MyLife cohort geographic representation.**  
15

16  
17  
18  
19 **Figure 3.**  
20 **Flow chart for the recruitment of the quantitative arm of the MyLife study.**  
21

22  
23  
24  
25 **Figure 4.**  
26 **Flow chart for the recruitment of the quantitative arm of the MyLife study.**  
27  
28  
29  
30  
31  
32  
33  
34  
35  
36  
37  
38  
39  
40  
41  
42  
43  
44  
45  
46  
47  
48  
49  
50  
51  
52  
53  
54  
55  
56  
57  
58  
59  
60



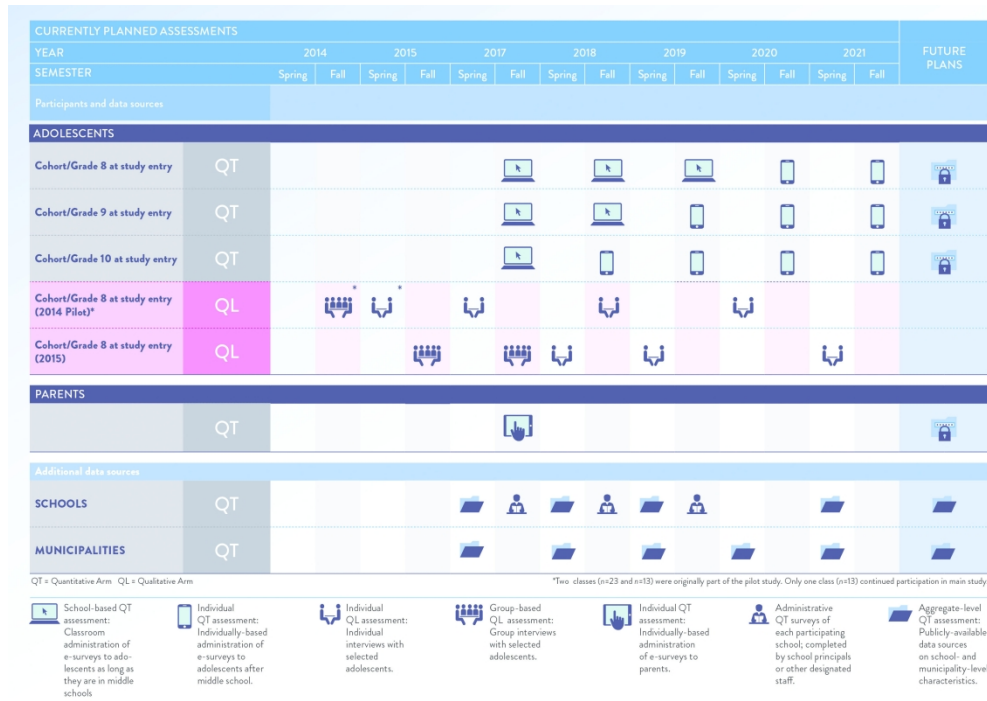

Figure 1. MyLife study design, data sources, and planned assessments.

279x194mm (300 x 300 DPI)

1  
2  
3  
4  
5  
6  
7  
8  
9  
10  
11  
12  
13  
14  
15  
16  
17  
18  
19  
20  
21  
22  
23  
24  
25  
26  
27  
28  
29  
30  
31  
32  
33  
34  
35  
36  
37  
38  
39  
40  
41  
42  
43  
44  
45  
46  
47  
48  
49  
50  
51  
52  
53  
54  
55  
56  
57  
58  
59  
60

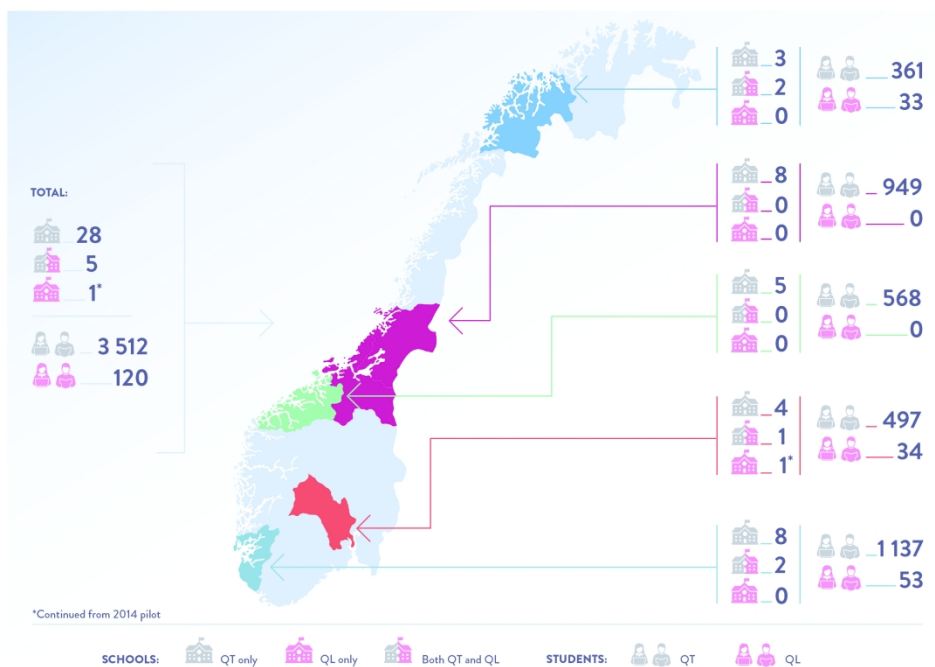

Figure 2.  
MyLife cohort geographic representation.

297x209mm (300 x 300 DPI)

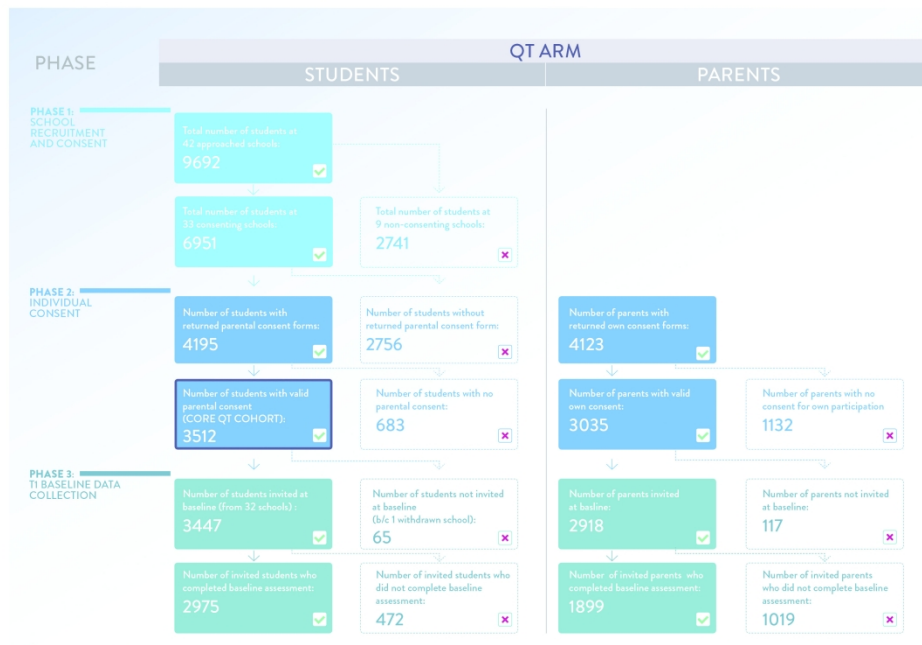

Figure 3. MyLife QT arm recruitment.

297x209mm (300 x 300 DPI)

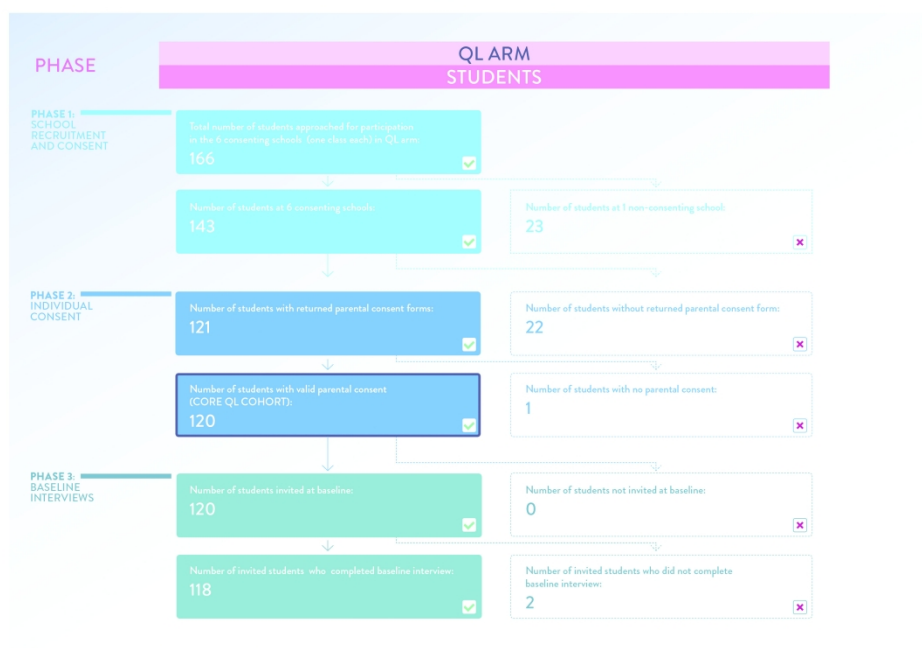

Figure 4. Flow chart for the recruitment of the quantitative arm of the MyLife study.

297x209mm (300 x 300 DPI)

# BMJ Open

## Cohort profile: Monitoring Young Lifestyles (MyLife), a prospective longitudinal quantitative and qualitative study of youth development and substance use in Norway

|                                 |                                                                                                                                                                                                                                                                                                                                                                                                                                                                                                                                                                                                                                      |
|---------------------------------|--------------------------------------------------------------------------------------------------------------------------------------------------------------------------------------------------------------------------------------------------------------------------------------------------------------------------------------------------------------------------------------------------------------------------------------------------------------------------------------------------------------------------------------------------------------------------------------------------------------------------------------|
| Journal:                        | <i>BMJ Open</i>                                                                                                                                                                                                                                                                                                                                                                                                                                                                                                                                                                                                                      |
| Manuscript ID                   | bmjopen-2019-031084.R1                                                                                                                                                                                                                                                                                                                                                                                                                                                                                                                                                                                                               |
| Article Type:                   | Cohort profile                                                                                                                                                                                                                                                                                                                                                                                                                                                                                                                                                                                                                       |
| Date Submitted by the Author:   | 29-Aug-2019                                                                                                                                                                                                                                                                                                                                                                                                                                                                                                                                                                                                                          |
| Complete List of Authors:       | Brunborg, Geir Scott; Norwegian Institute of Public Health, Department of Alcohol, Tobacco, and Drugs<br>Scheffels, Janne; Norwegian Institute of Public Health, Department of Alcohol, Tobacco, and Drugs<br>Tokle, Rikke; Norwegian Institute of Public Health, Department of Alcohol, Tobacco, and Drugs<br>Buvik, Kristin; Norwegian Institute of Public Health, Department of Alcohol, Tobacco, and Drugs<br>Kvaavik, Elisabeth; Norwegian Institute of Public Health, Department of Alcohol, Tobacco, and Drugs<br>Burdzovic Andreas, Jasmina; Norwegian Institute of Public Health, Department of Alcohol, Tobacco, and Drugs |
| <b>Primary Subject Heading</b>: | Public health                                                                                                                                                                                                                                                                                                                                                                                                                                                                                                                                                                                                                        |
| Secondary Subject Heading:      | Epidemiology, Sociology, Addiction                                                                                                                                                                                                                                                                                                                                                                                                                                                                                                                                                                                                   |
| Keywords:                       | prospective cohort, longitudinal study, substance use, adolescent development, quantitative research, QUALITATIVE RESEARCH                                                                                                                                                                                                                                                                                                                                                                                                                                                                                                           |
|                                 |                                                                                                                                                                                                                                                                                                                                                                                                                                                                                                                                                                                                                                      |

SCHOLARONE™  
Manuscripts

1  
2  
3  
4  
5  
6  
7 **COHORT PROFILE: Monitoring Young Lifestyles (MyLife), a prospective longitudinal**  
8 **quantitative and qualitative study of youth development and substance use in Norway.**  
9

10  
11  
12  
13  
14  
15 Geir Scott Brunborg<sup>a</sup>  
16 Janne Scheffels<sup>a</sup>  
17 Rikke Tokle<sup>a</sup>  
18 Kristin Buvik<sup>a</sup>  
19 Elisabeth Kvaavik<sup>a</sup>  
20 Jasmina Burdzovic Andreas<sup>a, \*</sup>  
21  
22  
23  
24  
25

26 <sup>a</sup> Norwegian Institute of Public Health  
27 Department of Alcohol, Tobacco, and Drugs  
28 PO Box 222-Skøyen  
29 N-0213 Oslo  
30 Norway  
31  
32

33 \*Corresponding (senior) author  
34 Jasmina Burdzovic Andreas, PhD ScM  
35 Norwegian Institute of Public Health  
36 Department of Alcohol, Tobacco, and Drugs  
37 PO Box 222-Skøyen  
38 N-0213 Oslo  
39 Norway  
40  
41  
42

43 Email: [jabu@fhi.no](mailto:jabu@fhi.no)  
44 Phone: (+47) 46 37 95 48  
45  
46  
47

48 **Word Count:** 4,700  
49

50 **Keywords:** prospective cohort, longitudinal study, substance use, adolescent development,  
51 quantitative methods, qualitative methods  
52  
53  
54  
55  
56  
57  
58  
59  
60

## ABSTRACT

**Purpose:** The Monitoring Young Lifestyles (MyLife) project was initiated as a multidisciplinary prospective investigation of correlates, causes, and consequences of adolescent substance use and other addictive behaviors in Norway.

**Participants:** The MyLife cohort was recruited from middle schools in Norway, which were selected from low, medium, and high standard of living areas in both rural and urban regions of the country. A total of 3,512 8<sup>th</sup>, 9<sup>th</sup>, and 10<sup>th</sup> graders (55% girls) from 33 schools were enrolled in the quantitative project arm (QT), while a total of 120 8<sup>th</sup> graders (52% girls) from 6 schools were enrolled in the qualitative project arm (QL).

**Findings to date:** QT baseline was conducted in the fall of 2017, when 2,975 adolescents completed an on-line questionnaire during a regular class time. A total of 2,857 adolescents participated in the first QT follow-up one year later. QL baseline was conducted across the Fall semesters of 2014 (1 class) and 2015 (5 classes), when a total of 118 8<sup>th</sup> graders completed face-to-face interviews. QL follow-ups were conducted in the spring of 2015 and fall of 2017 ( $n = 98$ ) for group interviews, and in the spring of 2017 and 2018 ( $n = 95$ ) for individual interviews. In terms of additional data sources, a total of 3,035 parents consented to own participation, of which 1,899 completed a brief on-line questionnaire at QT baseline in late 2017. School principals completed brief surveys at the same time.

**Future plans:** Both QT and QL arms have planned follow-ups through 2021. Consents were obtained for individual-level linkages of adolescent and parental quantitative surveys to each other, as well as to the data available in multiple national registries and databases. These supplemental data sources will provide key information on additional putative exposures as well as on long-term health, educational, and social outcomes in the MyLife cohort.

### Strengths and limitations of this study

- To the best of our knowledge, Monitoring Young Lifestyles (MyLife) is the first integrated quantitative and qualitative prospective study of youth in Norway that specifically focuses on substance use and related behaviors.
- MyLife quantitative arm encompasses adolescent participants of wider age ranges (3 grades/cohorts, 13-16 years old at baseline), sizeable samples (approximately 1,000 per grade/cohort), and multiple and balanced follow-ups (annual, for 5 years).
- MyLife qualitative arm encompasses sizeable samples (approximately 120 8<sup>th</sup> graders from 6 schools/classes) and multiple follow-ups (a total of 5 group- and individual interviews over the period of 6 years).
- The consent and recruitment procedures were limited by privacy and confidentiality concerns, with possible implications for representativeness and related inferences.
- Future plans involve individual-level linkages of adolescent and parental quantitative surveys to each other, as well as to the individual-level health and social registries data to ultimately extend the current knowledge on adolescent development in general, and on substance use and addictive behaviors in particular.



## INTRODUCTION

Adolescent substance use remains a significant public health concern, as early substance use is associated with a range of adverse psychological, social, and health outcomes<sup>1-3</sup>. In addition, the Global Burden of Disease project ranks substance use and the related disorders among the most important risk factors for mortality and disability in high income countries such as Norway<sup>4 5</sup>. This burden is especially salient among the youngest, as mental health and substance use disorders are the primary contributors to disability in youth from high-income countries<sup>6</sup>. For example, among those between 5 and 14 years of age in Norway, alcohol use remains the number one behavioral risk for mortality and number three risk for disability<sup>5</sup>.

Understanding the use of alcohol, tobacco, and other drugs, as well as the causes and consequences of these behaviors as they occur early in life is therefore of key public health importance, both in Norway and internationally. The relevant research no longer seeks to simply identify the most important risk and protective factors<sup>7-9</sup>; instead, it increasingly aims to understand their complex contribution to varied patterns and developmental trajectories of early drinking, smoking, and drug use<sup>10-17</sup>. Indeed, understanding the developmental course of substance use has become central to understanding the causes, onset, timing, duration, and consequences of these behaviors. More importantly, understanding how different substance use patterns develop and progress over time and across various sub-populations ultimately informs not only our understanding of the associated risk and protective factors, but also of the potential prevention and treatment strategies<sup>7 8 18</sup>.

Such questions are best explored within the developmental psychopathology and epidemiology frameworks and social-ecological theories of human development<sup>19-27</sup>. These

1  
2  
3 approaches study developing individuals within their social contexts (i.e., families, schools,  
4  
5 cultures, etc.) and focus on causal mechanisms underlying developmental shifts towards or  
6  
7 away from pathological outcomes and problem behaviors such as substance use<sup>20-22 27-30</sup>. And  
8  
9 while these fields have been traditionally dominated by quantitative approaches and  
10  
11 statistical analyses, integration of qualitative methods into core developmental  
12  
13 psychopathology frameworks can offer unique advantages<sup>31 32</sup>. Specifically, qualitative  
14  
15 methods address the “why” questions and provide insights into the larger socio-cultural  
16  
17 contexts in which individuals develop<sup>33 34</sup>; the results from the integrated studies therefore  
18  
19 offer both depth and breadth in understanding of youth development and cultures. For  
20  
21 example, repeated interviews with adolescents can help us map and describe the complex  
22  
23 social and cultural processes underlying their use of alcohol, tobacco, or drugs. Yet,  
24  
25 multidisciplinary and mixed methods studies of early substance use remain few and far  
26  
27 between, constrained by the high-risk samples, cross-sectional designs, and general non-  
28  
29 reliance on developmental framework<sup>35 36</sup>.

30  
31  
32  
33  
34  
35  
36  
37  
38 These research challenges and the resulting knowledge gaps are especially evident in  
39  
40 Norway, where substance use remains a significant public health issue and policy priority<sup>37</sup>.  
41  
42 While numerous Norwegian cross-sectional reports examined various aspects of early  
43  
44 substance use<sup>38-46</sup>, such studies could not fully address the key questions of causal pathways  
45  
46 and intra-individual developments over time. A handful of notable longitudinal reports also  
47  
48 remain somewhat limited: even though they are based on large, well-established prospective  
49  
50 cohorts (e.g., the Young in Norway Longitudinal Study<sup>47</sup> or the Tracking Opportunities and  
51  
52 Problems Study<sup>48</sup>), these projects were not established with the specific purpose of  
53  
54 investigating early substance use. Finally, a comprehensive qualitative longitudinal  
55  
56  
57  
58  
59  
60

1  
2  
3 investigation of substance use among youth, the surrounding cultures and underlying  
4  
5 processes has not been undertaken in Norway so far.  
6  
7

8  
9 Given the above-identified gaps, the MyLife project was initiated as a large-scale  
10  
11 multidisciplinary and mixed-methods prospective investigation of early substance use and  
12  
13 other addictive behaviors, their normative and non-normative developmental courses, their  
14  
15 varied causes and consequences, putative comorbidities, and underlying psychological and  
16  
17 social processes and mechanisms. Our primary research questions will therefore focus on  
18  
19 identification and examination of risk and protective factors associated with substance use  
20  
21 patterns across adolescence. Closer examination of sensitive developmental periods and  
22  
23 larger contextual factors in relation to changes both across and within individuals will also be  
24  
25 prioritized. These questions will be examined both quantitatively (i.e., examination of  
26  
27 adolescents' repeated surveys, parental surveys, and various administrative data sources) and  
28  
29 qualitatively (i.e., examination of adolescents' repeated individual and group-based  
30  
31 interviews using thematic content and narrative analyses). Further, we aim to both  
32  
33 quantitatively and qualitatively explore numerous under-studied and emerging questions,  
34  
35 including the problematic use of social media and video games<sup>49-52</sup>, the role of alcohol and  
36  
37 drug use opportunities<sup>39 42 53</sup>, putative gender, ethnic, and socio-economic variations and  
38  
39 differences<sup>15 54 55</sup>, resilient outcomes in face of multiple risk factors<sup>41</sup>, and shifting cultural  
40  
41 norms and behaviors surrounding early substance use<sup>45 56-59</sup>. Finally, a wider range of research  
42  
43 questions and outcomes extending beyond adolescence can eventually be addressed through  
44  
45 various secondary projects and data analyses and the planned individual-level linkages of  
46  
47 quantitative data with other administrative and health data sources readily available in  
48  
49 Norway<sup>60</sup>. The study ultimately aims to narrow the existing research gap, to inform relevant  
50  
51 public health policies, and to improve prevention and intervention strategies concerning early  
52  
53  
54  
55  
56  
57  
58  
59  
60

1  
2  
3 substance use and other addictive behaviors. This report describes the MyLife project, its  
4  
5 design and sampling, recruitment and data collection for quantitative and qualitative project  
6  
7 arms, core cohorts, and selected preliminary results.  
8  
9

## 10 11 12 13 14 **COHORT DESCRIPTION**

### 15 16 17 **MyLife core project design and procedures**

18  
19  
20 A prospective longitudinal design was selected as the most scientifically and logistically  
21  
22 feasible one, and was fully integrated into the MyLife quantitative and qualitative project arms  
23  
24 (described below). Middle school students were identified as the most appropriate target  
25  
26 population, given that they were a) of ages immediately preceding the largely normative onset  
27  
28 of studied behaviors, and b) cognitively capable of informed assent and independent survey  
29  
30 and interview participation. Consequently, middle schools were identified as the most  
31  
32 appropriate recruitment and initial assessment platforms. The project consists of three main  
33  
34 components, described below and in Figure 1:  
35  
36  
37  
38

39  
40  
41 *1. Quantitative Arm (QT):* This arm was designed as a multi-cohort study with five  
42  
43 annual prospective assessments (a.k.a., 'accelerated longitudinal design', ALD). ALD was  
44  
45 selected as the most efficient design, given the budgetary, time, and staff constraints<sup>61-63</sup>.  
46  
47 Additional features include integration of multiple cohorts (3 school cohorts; middle school  
48  
49 grades 8, 9, and 10 at QT baseline), sizeable samples (approximately 1,000 students from each  
50  
51 cohort/grade), and relatively frequent and balanced follow-ups (annual, for five years). Data  
52  
53 collection windows for all 5 annual assessments were set during the Fall semester, with closing  
54  
55 at the last day of that calendar year (i.e., September through December 31). The chosen QT  
56  
57 design fully reflects our key theoretical models and scientific aims while optimizing data  
58  
59  
60

1  
2  
3 collection time and robustness to dropout<sup>61 64</sup>. It also facilitates modeling of complex  
4 trajectories, patterns, and groups; of conjoint and comorbid outcomes over time; and of  
5 critical developmental events, periods, and shifts<sup>63-67</sup>.  
6  
7  
8  
9

10  
11 *2. Qualitative Arm (QL):* This arm was designed as a semi-structured longitudinal study  
12 encompassing five semi-structured group- and individual interview assessments over the  
13 period of six years. Enrollment and interviews schedule (i.e., timeline and balancing between  
14 the individual and group interviews) were based on methodological and structural  
15 considerations ranging from availability of research funds and staff, to availability of  
16 participating schools and students. This arm featured a single-cohort design, where only 8<sup>th</sup>  
17 graders were included. The developmental approach was chosen in order to understand a  
18 broad range of adolescents' experiences over time, including alcohol, tobacco and drug use<sup>68</sup>.  
19  
20  
21  
22  
23  
24  
25  
26  
27  
28  
29

30  
31 *3. Parental QT reports and additional data sources:* Parental reports completed at QT  
32 baseline provide additional information beyond the youth self-reports, whereas the school  
33 principals' reports completed at QT baseline provide information on school characteristics  
34 thereby facilitating both quantitative and qualitative contextual analyses. Further, publically  
35 accessible administrative data on schools and communities will also enable quantitative and  
36 qualitative examination of larger structural factors potentially shaping developmental  
37 trajectories and health outcomes of interest. Finally, MyLife also aims to link adolescent and  
38 parental QT responses to a range of objective indicators of health, adjustment, and well-being  
39 available through various national registries<sup>60</sup>. Study design, all participants, data sources,  
40 and planned timelines are shown in Figure 1.  
41  
42  
43  
44  
45  
46  
47  
48  
49  
50  
51  
52  
53  
54

55  
56 It should be noted that the original MyLife design proposed overlapping QL and QT  
57 samples, as well as the common baseline for the Fall semester of 2015. The separation of data  
58  
59  
60

1  
2  
3 collection schedules for the two arms resulted from a lengthy evaluation process by the  
4  
5 Norwegian Data Protection Authority (DPA). Nevertheless, the MyLife project still facilitates  
6  
7 mixed methods analyses, albeit not at the individual student level<sup>34 59</sup>.  
8  
9

## 10 **Setting**

11  
12  
13  
14 The setting for the study is Norway, a high income country in Northern Europe with a  
15  
16 relatively small population, characterized by a generous welfare state with public education  
17  
18 and universal health care systems. Norway is ranked number one on the Inequality-adjusted  
19  
20 Human Development Index<sup>69</sup>. The main behavioral risk factors for both years of life lost and  
21  
22 years lived with disability in the population between 15 and 49 years of age are tobacco,  
23  
24 alcohol, and drug use<sup>5</sup>.  
25  
26  
27  
28

## 29 **Sampling and recruitment**

30  
31  
32 The first step in sampling procedures involved selection of geographical areas. To  
33  
34 ensure geographic and sample diversity, 5 out of 19 counties in Norway were chosen for study  
35  
36 inclusion: one each from the north (Troms), from the middle (Sør-Trøndelag), from the west  
37  
38 (Møre og Romsdal), from the south (Rogaland), and from the east (Buskerud) of the country,  
39  
40 see Figure 2. The second step involved ensuring representation of both urban and rural areas.  
41  
42 Within each county, we first selected the schools from the largest city in the county, and then  
43  
44 schools from rural municipalities – but for practical reasons, still within a 2-hrs drive from the  
45  
46 largest city. Schools with fewer than 50 students were excluded because of a poor cost-benefit  
47  
48 ratio. The third step involved ensuring representation of low, middle, and high standard of  
49  
50 living communities. To this end, we used the Standard of Living Index (SLI) -- a standardized  
51  
52 indicator available from Statistics Norway for all Norwegian municipalities up to 2008 and  
53  
54 reflecting community-level characteristics ranging from social security, single parent, and  
55  
56  
57  
58  
59  
60

1  
2  
3 disability payments, to mortality and unemployment rates<sup>70</sup>. The municipalities within  
4  
5 counties, and the districts within cities were sorted into low, middle and high SLI categories  
6  
7 using tertile splits. Municipalities/districts were drawn from the sorted list using a random  
8  
9 number generator so that 30%, 40% and 30% of the target sample would be from low, medium  
10  
11 and high SLI communities, respectively.  
12  
13  
14  
15

16 In almost all cases, there was only one eligible school within each geographical area.  
17  
18 In cases with more than one school, the target school was selected through a random number  
19  
20 generator. This procedure resulted in 42 schools with upwards of 9,500 middle school  
21  
22 students (see Figure 2 for details) suitable for both QT and QL arm participation. Two  
23  
24 additional schools previously identified in the pilot project were eligible for QL.  
25  
26  
27  
28

29 The enrollments in the identified schools ranged from 54 to 529 middle school  
30  
31 students. All 42 schools were contacted and invited to participate in the QT arm. Nine schools  
32  
33 declined, leaving 33 schools with about 7,000 middle school students potentially available for  
34  
35 study inclusion. A total of 7 schools were invited to participate in the QL arm; 5 schools  
36  
37 identified through the procedure above were eligible for new participation, while 2 schools  
38  
39 identified during the pilot study were eligible for continued participation. One school  
40  
41 declined, leaving a total of 6 QL eligible schools. The ultimate aim was to enroll full 8<sup>th</sup>, 9<sup>th</sup>,  
42  
43 and 10<sup>th</sup> grade cohorts from each school if possible (for QT) and one 8<sup>th</sup> grade class/cohort per  
44  
45 school (for QL). These school recruitment procedures were completed in 2015 and are shown  
46  
47 in Figure 3 (for QT) and Figure 4 (for QL).  
48  
49  
50  
51  
52  
53

#### 54 **Informed consent**

55  
56  
57 General procedures: Because of the respondents' young age, informed parental  
58  
59 consent was required before the children could be invited to participate, or give assent for  
60

1  
2  
3 own participation in the MyLife study. The schools were provided with information packages  
4 containing a printed booklet describing the project in plain language, explicit consent form,  
5  
6 and a secure return envelope; this package was administered to all students during regular  
7  
8 class time. Students were asked to take the package home, share it with their parents, and to  
9  
10 return sealed envelopes with completed consent forms to their teachers by a deadline. In  
11  
12 order to estimate as accurate as possible response and consent rates, we asked that the forms  
13  
14 be returned even if no consent for study participation was granted. Those with parental  
15  
16 consent were asked to assent for own participation immediately preceding the QT and QL  
17  
18 baseline assessments.  
19  
20  
21  
22  
23  
24  
25

26 QT consent: Parents were asked to consent to their child(ren)'s participation in all of  
27  
28 the planned five annual rounds of the QT arm. This involved completing a 30-minute  
29  
30 questionnaire during a school hour while they were in middle school, and in a private setting  
31  
32 after they graduated middle school. The consent also involved permission for the individual-  
33  
34 level linkages of the obtained QT data to the data available in the national health (e.g.,  
35  
36 information on primary and specialized health utilization) and other registries (e.g.,  
37  
38 information on education, welfare, and unemployment) pending necessary ethical and  
39  
40 research approvals. In addition, parents were asked to consent to be invited to complete a  
41  
42 brief electronic questionnaire of their own and, if so, to future registry linkages as well.  
43  
44  
45  
46  
47

48 In the beginning of the 2017 Fall semester, 4,195 valid QT consent forms were returned  
49  
50 wherein the explicit parental consent was obtained for 3,512 children. A total of 3,035 parents  
51  
52 also gave consent for their own study participation. The individual consent rate varied widely  
53  
54 across schools, ranging from 23.2% to 96.1%. The inclusion flow for the QT arm is shown in  
55  
56 Figure 3, including the baseline assessment.  
57  
58  
59  
60



1  
2  
3        QL consent: A subgroup of 143 students from 6 schools (one 8<sup>th</sup> grade class/cohort per  
4 school) were approached in 2015 following the main school recruitment procedures. Similar  
5 to the QT procedures above, parents were asked to consent to their child's participation in  
6 the QL arm involving both individual and group interviews over time. Parental consent for the  
7  
8  
9  
10  
11  
12  
13  
14  
15  
16  
17  
18  
19  
20  
21  
22  
23  
24  
25  
26  
27  
28  
29  
30  
31  
32  
33  
34  
35  
36  
37  
38  
39  
40  
41  
42  
43  
44  
45  
46  
47  
48  
49  
50  
51  
52  
53  
54  
55  
56  
57  
58  
59  
60

*QL consent*: A subgroup of 143 students from 6 schools (one 8<sup>th</sup> grade class/cohort per school) were approached in 2015 following the main school recruitment procedures. Similar to the QT procedures above, parents were asked to consent to their child's participation in the QL arm involving both individual and group interviews over time. Parental consent for the QL arm participation was obtained for 120 students (see Figure 4).

### **Patient and public involvement**

This study involves no patients. School principals and contact persons also provided feedback after the baseline data collection, which aided the fine-tuning of follow-up procedures. Study progress and selected aggregate results are shared with those directly involved (schools, parents, adolescents) through semi-annual newsletters, and with general public via the project NIPH-based website.

### **Data Collection**

*Pilot study*: A small scale mixed-methods pilot study including 4 middle schools and 1 high school ( $N = 851$ ) was conducted in 2014 to test recruitment strategies, modes of data collection, and questionnaire/interview content for both study arms. The QT pilot involved 5 cohorts: 8<sup>th</sup>, 9<sup>th</sup>, and 10<sup>th</sup> grade middle school students, and first and second year high-school students. The results informed several key aspects of the main study. For example, high-school cohorts were eliminated from baseline inclusion as scientifically and logistically non-efficient; questionnaires were simplified to be appropriate for younger adolescents and several sensitive items were removed (e.g., suicidality module); reimbursement strategies were fine-tuned to include gift cards of meaningful value for individual participation in combination with random lottery drawings of highly prized items such as iPhones; and

1  
2  
3 National Identity Numbers were selected as the primary means of participant identification  
4  
5 and data linkages.  
6  
7

8 The QL pilot included two 8<sup>th</sup> grade classes ( $n = 36$ ), and it also tested recruitment  
9 strategies, interview topics, and assessment techniques. The pilot informed the main study  
10 decisions concerning the timing and balance of individual and group interviews, group sizes  
11 and composition, etc. Importantly, one of the pilot classes ( $n = 13$ ) continued participation,  
12 and is included in the core QL sample even though its baseline was completed one year ahead  
13 of the main study schedule. Specifically, interviews with these participants continue to inform  
14 the decisions on how to proceed with the rest of the core sample, including the selection of  
15 emerging topics for both QT surveys and QL interviews.  
16  
17  
18  
19  
20  
21  
22  
23  
24  
25  
26  
27

28 The pilot characteristics and selected results are described elsewhere<sup>45 49 55 58</sup>.  
29  
30

### 31 **1. QT data collection**

32 **QT baseline:** During the first wave of QT data collection, the entire cohort of 3,512  
33 students was invited to complete a 30-minute electronically-administered questionnaire  
34 during a regular school hour. All but one of the 33 invited schools managed to organize data  
35 collection. Due to this one withdrawn school ( $n_{\text{enrolled}} = 65$ ), a total of 3,447 instead of the  
36 eligible 3,512 students were invited (see Figure 3 also). Teachers supervised data collection  
37 during class time, by reading aloud a standardized MyLife study guide which described again  
38 the purpose of the study, assent, and confidentiality; provided practical information about  
39 accessing the on-line questionnaire; and reminded the students that they are free to decline  
40 participation or withdraw from the study altogether (including the right to have information  
41 collected about them deleted). Students were instructed to type in a Uniform Resource  
42 Locator (URL) in their web-browsers, which gave them access to the questionnaire. Those  
43  
44  
45  
46  
47  
48  
49  
50  
51  
52  
53  
54  
55  
56  
57  
58  
59  
60

1  
2  
3 without parental consent were instructed to do schoolwork for the duration of the class. A  
4  
5 contact person at each school received 1,000 Norwegian Kroner (about 100 Euros) as  
6  
7 compensation for assisting with data collection, while each participating class received the  
8  
9 same amount into their class' savings account regardless of the individual response rates.  
10  
11  
12

13 The questionnaire assessed a wide range of topics and characteristics, with a particular  
14  
15 focus on family background, leisure time activities, personal characteristics, and substance  
16  
17 use. An overview of the baseline master questionnaire is presented in Table 1. The  
18  
19 questionnaire contained sufficient contact details to allow student identification in the  
20  
21 Norwegian Population Registry and facilitate linkages to the unique National Identity  
22  
23 Numbers. After removing the cases with insufficient contact information and duplicates, a  
24  
25 total of 2,975 valid responses remained, yielding a response rate of 85%. For 8<sup>th</sup>, 9<sup>th</sup>, and 10<sup>th</sup>  
26  
27 graders, the response rate was 88%, 81%, and 85% respectively.  
28  
29  
30  
31  
32  
33  
34  
35  
36  
37  
38  
39  
40  
41  
42  
43  
44  
45  
46  
47  
48  
49  
50  
51  
52  
53  
54  
55  
56  
57  
58  
59  
60

**Table 1.**  
**Brief overview of topics encompassed in the MyLife QT adolescent baseline questionnaire (2017)**

| Topic                             | Items                                                                                                                                                                                                                                                                                                                     |
|-----------------------------------|---------------------------------------------------------------------------------------------------------------------------------------------------------------------------------------------------------------------------------------------------------------------------------------------------------------------------|
| Socio-demographic characteristics | Gender; birthdate; school and county; grade; residence; household composition; immigrant status; parental SES (employment and educations); religious affiliation; perceived SES; income                                                                                                                                   |
| Parent-child relationships        | Parental knowledge of child's leisure time; discipline; frequency of breaking rules; consequences of breaking rules; feel safe at home                                                                                                                                                                                    |
| Risk and protective factors       | Stress/Negative life events; leisure time activities; unsupervised leisure time; sports/music/hobbies involvement; social media and videogames; gambling; personality and temperamental traits; delinquency                                                                                                               |
| School and peer experiences       | Truancy; school connectedness; core GPA last semester; plans for further education; close friendships; popularity among peers; victimization and mobbing experiences; boyfriends/girlfriends history; boyfriend/girlfriend use of tobacco, alcohol and cannabis.                                                          |
| Health and diet                   | Pubertal timing; physical and learning disabilities; self-rated physical health; soft-drinks and energy drinks intake; use of painkillers; injury; violence; depression symptoms                                                                                                                                          |
| Alcohol                           | Exposure to drinking opportunities; alcohol use, and alcohol intoxication, and episodic heavy drinking histories; initiation age; usual alcohol quantity; drinking with parents; received alcohol from parents; witnessing of parental intoxication; alcohol expectancies; perceived harmfulness; legalization attitudes. |
| Tobacco                           | Cigarettes, snus and e-cigarette use histories; initiation age; last time used; usual quantity/day; place of purchase; beliefs about cigarette smoking; witnessing of parental cigarette and snus use; perceived harmfulness; legalization attitudes.                                                                     |
| Cannabis                          | Exposure to cannabis use opportunities; cannabis use history; initiation age; willingness to trying cannabis; perceived cannabis availability; cannabis use expectancies; perceived harmfulness; legalization opinions.                                                                                                   |
| Other substances                  | Synthetic cannabinoids; MDMA; Amphetamines; Cocaine; Prescription medications.                                                                                                                                                                                                                                            |

1  
2  
3 **QT first annual follow-up:** By the 2018 Fall semester, students who were in 10<sup>th</sup> grade  
4  
5 at study entry in 2017 had graduated middle school and most had entered high-school. For  
6  
7 those who were still in middle school ( $n = 2,515$ ), the data collection procedure remained the  
8  
9 same as at baseline, with the exception that the teachers handed them a secure note with a  
10  
11 unique pre-assigned PIN-code to enter in the questionnaire.  
12  
13  
14  
15

16 Those who had graduated middle-school ( $n = 997$ ) could no longer be assessed in  
17  
18 structured school settings, and were approached individually. First, a newsletter with updated  
19  
20 information about the MyLife study and about the upcoming round of data collection was  
21  
22 mailed to their home addresses. Shortly after, an e-mail invitation with a link to the  
23  
24 questionnaire was sent to each student, including the information that their time and effort  
25  
26 would be reimbursed with a 200 Norwegian Kroner gift card (about 20 Euros). Three reminders  
27  
28 were sent to non-responders via e-mail and SMS during the fall of 2018.  
29  
30  
31  
32

33 The first QT follow-up was completed by 2,857 adolescents (i.e., 81% of the cohort).  
34  
35 For the 9<sup>th</sup> and 10<sup>th</sup> graders who again responded in school setting, the response rate was  
36  
37 85.4% and 84.4% respectively. For those who were approached individually, the response rate  
38  
39 was 72.3%. Out of the entire QT cohort ( $N = 3,512$ ), 5.5% had not participated in 2017 or in  
40  
41 2018 ( $n = 194$ ); 13.1% ( $n = 461$ ) had participated only in 2017; and 9.8% ( $n = 343$ ) had  
42  
43 participated only in 2018. A total of 71.6 % ( $n = 2,514$ ) had participated both in the 2017  
44  
45 baseline and in the 2018 follow-up.  
46  
47  
48  
49

## 50 51 **2. QL data collection**

52  
53  
54 **QL baseline:** The first wave of QL data collection was initiated in 2015 with 5 newly-  
55  
56 enrolled classes of 8<sup>th</sup> graders. In addition, one class completed baseline interviews in 2014,  
57  
58 as part of the pilot study (see Figure 4). This translated into a total of 6 8<sup>th</sup> grade classes from  
59  
60

1  
2  
3 6 schools ( $n = 118$ ). All baseline interviews were group interviews of approximately 45 minutes  
4 duration; a total of 26 interview sessions were completed. QL baseline reimbursements for  
5 both the student participants and teacher assistants were identical to the QT procedures.  
6  
7  
8  
9

10 **QL follow-ups:** The first QL follow-up (Time 2; 2017 Fall semester) of the 5 core classes  
11 was conducted when students were in the 10<sup>th</sup> grade (i.e., 2017 Fall semester). These were  
12 group interviews similar to the baseline. Interviews were conducted in smaller groups of 4-6  
13 students each; a total of 24 group interviews were conducted with 85 students. The first  
14 follow up with the one pilot class was conducted during the 2015 Spring semester, when those  
15 students were in the second semester of the 8<sup>th</sup> grade ( $n = 13$ ).  
16  
17  
18  
19  
20  
21  
22  
23  
24

25 The second follow-up for all 6 participating classes was conducted during the second  
26 semester of their respective 10<sup>th</sup> grade (Time 3; 2018 Spring semester for the 5 core classes;  
27 2017 Spring semester for one pilot class). These were individual interviews; a total of 95  
28 interviews of approximately 40 minutes duration were conducted during regular school hours.  
29 Participants were reimbursed with a 300 Norwegian Kroner (approximately 30 Euros) gift card  
30 for their time and effort invested into individual interviews.  
31  
32  
33  
34  
35  
36  
37  
38  
39

### 40 **3. Additional data collection and data sources**

41 **QT parental baseline:** A total of 3,035 parents had consented to their own  
42 participation in the study. Of these, 2,918 provided sufficient contact information and were  
43 thus invited in late 2017 to take part in the MyLife study with an e-mail containing a  
44 questionnaire link. Two reminder e-mails were sent to non-responders, and by the end of the  
45 data collection in December 2017, 1,899 parents had completed the questionnaire. A total of  
46 276 parents had two children, and two parents had three children who participated in the  
47  
48  
49  
50  
51  
52  
53  
54  
55  
56  
57  
58  
59  
60

1  
2  
3 MyLife QT arm. Therefore, parents of a total of 2,041 QT children completed parental  
4  
5 questionnaires. Parents were not reimbursed.  
6  
7

8  
9 The content of the parental questionnaire is summarized in Table 2. This 15-min  
10  
11 questionnaire included items concerning the demographic, health, and well-being of the  
12  
13 responding parent (the mother in 79% of cases) and the other parent in the household (if any),  
14  
15 as well as the items concerning the MyLife participating child(ren).  
16  
17

18  
19 **QT school administrative survey:** At QT baseline, school administrators from all  
20  
21 recruited schools were invited to complete a brief on-line survey. Out of the 34 schools, 21  
22  
23 responded, providing both the feedback regarding their MyLife participation experiences and  
24  
25 additional information about their school characteristics; e.g., the type of prevention  
26  
27 programs implemented (if any), school rules and disciplinary measures, distance to alcohol  
28  
29 outlets, etc.  
30  
31  
32  
33  
34  
35  
36  
37  
38  
39  
40  
41  
42  
43  
44  
45  
46  
47  
48  
49  
50  
51  
52  
53  
54  
55  
56  
57  
58  
59  
60

**Table 2.**  
**Brief overview of areas encompassed in the MyLife QT parental baseline questionnaire (2017)**

| Topic                                       | Items                                                                                                                                                                                                          |
|---------------------------------------------|----------------------------------------------------------------------------------------------------------------------------------------------------------------------------------------------------------------|
| <b>Information reported about self</b>      |                                                                                                                                                                                                                |
| Socio-demographic characteristics           | Gender; date of birth; household composition; own and partner's education; own and partner's employment status; household income; home ownership; perceived SES                                                |
| Risk and protective factors                 | Self-rated physical and mental health; relationship satisfaction; agreement re: important decisions; agreement re: childrearing; negative life events; personality                                             |
| Substance use                               | Tobacco, snus, alcohol, and cannabis use histories; drinking with child(ren) present; house rules about smoking; legalization opinions; knowledge of and attitudes towards child(ren)'s possible substance use |
| <b>Information reported about the child</b> |                                                                                                                                                                                                                |
| Socio-demographic characteristics           | Gender; date of birth; twin status; nature of relationship with child                                                                                                                                          |
| Child characteristics                       | Learning and physical disabilities; temperament; conduct problems                                                                                                                                              |
| Parent-child relationships                  | Parental knowledge of child's leisure time; discipline; frequency of breaking rules; consequences of breaking rules                                                                                            |
| School and peer experiences                 | Interacting with other parents at school; knowing other children at school                                                                                                                                     |



## FINDINGS TO DATE

*Core cohort characteristics*

A brief overview of the core cohort characteristics is shown in Table 3a (for the QT cohort;  $N = 3,512$ ) and in Table 3b (for the QL cohort,  $N = 120$ ).

**Table 3a.**  
Brief overview of the MyLife core QT cohort characteristics ( $N = 3,512$ )

| Characteristics                                            | <i>N</i> | %     |
|------------------------------------------------------------|----------|-------|
| <b>Gender:</b>                                             |          |       |
| Girls                                                      | 1,923    | 54.8% |
| Boys                                                       | 1,589    | 45.2% |
| <b>Cohort (middle school grade at baseline inclusion):</b> |          |       |
| 8 <sup>th</sup>                                            | 1,295    | 36.9% |
| 9 <sup>th</sup>                                            | 1,220    | 34.7% |
| 10 <sup>th</sup>                                           | 997      | 28.4% |
| <b>County:</b>                                             |          |       |
| Buskerud (East)                                            | 497      | 14.2% |
| Møre og Romsdal (West)                                     | 568      | 16.2% |
| Rogaland (South)                                           | 1,137    | 32.4% |
| Sør-Trøndelag (Middle)                                     | 949      | 27.0% |
| Troms (North)                                              | 361      | 10.3% |
| <b>School location:</b>                                    |          |       |
| Rural municipality                                         | 1,293    | 36.8% |
| Town/city                                                  | 2,219    | 63.2% |
| <b>Municipal/city district standard of living tertile:</b> |          |       |
| Low                                                        | 956      | 27.2% |
| Medium                                                     | 1,394    | 39.7% |
| High                                                       | 1,162    | 33.1% |

**Table 3b.**  
Brief overview of the MyLife core QL cohort characteristics ( $N = 120$ )

| Characteristics                                            | <i>N</i> | %     |
|------------------------------------------------------------|----------|-------|
| <b>Gender:</b>                                             |          |       |
| Girls                                                      | 62       | 51.7% |
| Boys                                                       | 58       | 48.3% |
| <b>Cohort (middle school grade at baseline inclusion):</b> |          |       |
| 8 <sup>th</sup>                                            | 120      | 100%  |
| (Fall semester 2014)                                       | 13       | 11%   |
| (Fall semester 2015)                                       | 107      | 89%   |
| <b>Province:</b>                                           |          |       |
| East                                                       | 34       | 25.8% |
| West                                                       | 53       | 40.0% |
| North                                                      | 33       | 34.1% |
| <b>School location:</b>                                    |          |       |
| Rural municipality                                         | 30       | 25.0% |
| Town/city                                                  | 90       | 75.0% |
| <b>Municipal/city district standard of living tertile:</b> |          |       |
| Low                                                        | 43       | 35.8% |
| Medium                                                     | 34       | 28.3% |
| High                                                       | 43       | 35.8% |

### QT preliminary results

Descriptive statistics for selected demographic and substance use variables for adolescent QT baseline are presented in Table 4, including basic distributions by gender and grade cohorts. The majority of responders were born in Norway, and had parents who lived together and were employed; many assigned high social status to their family when compared to other families in the neighborhood.

In terms of the observed key outcomes, about 1 in 6 had consumed alcohol in their lifetime, but only 1 in 16 had consumed alcohol in the last 30 days. While 9% reported having tried snus, only about 1/3 of those reported using it in the last 30 days. This was also the case

1  
2  
3 for cigarette smoking – most of those who had ever tried smoking had not smoked a cigarette  
4  
5 in the last 30 days. Reported experimentation with cannabis and other illicit drugs was  
6  
7 minimal.  
8  
9

10  
11 Significantly more boys than girls had tried snus, cigarettes and cannabis, but there  
12  
13 were no gender differences in alcohol consumption, snus use, and cigarette smoking in the  
14  
15 last 30 days. All substance use outcomes, save for trying illicit drugs, were more prevalent in  
16  
17 older cohorts, as expected.  
18  
19  
20  
21  
22  
23  
24  
25  
26  
27  
28  
29  
30  
31  
32  
33  
34  
35  
36  
37  
38  
39  
40  
41  
42  
43  
44  
45  
46  
47  
48  
49  
50  
51  
52  
53  
54  
55  
56  
57  
58  
59  
60

**Table 4.**  
**MyLife core QT cohort demographic and key substance use outcomes at baseline (N = 2,975)**

|                                                         | Total<br>(N= 2,975) | Girls<br>(n = 1,668) | Boys<br>(n = 1,307) | Grade 8<br>(n = 1,141) | Grade 9<br>(n = 989) | Grade 10<br>(n = 845) |
|---------------------------------------------------------|---------------------|----------------------|---------------------|------------------------|----------------------|-----------------------|
| <b>Adolescent self-reported demographic variables</b>   |                     |                      |                     |                        |                      |                       |
| Age                                                     | 13.9 (0.82)         | 13.9 (0.81)          | 13.9 (0.83)         | 13.0 (0.09)            | 14.0 (0.09)          | 15.0 (0.09)           |
| Born in Norway                                          | 93.4%               | 93.5%                | 93.3%               | 93.2%                  | 93.7%                | 93.2%                 |
| Parents live together                                   | 72.1%               | 71.1%                | 73.4%               | 73.2%                  | 70.5%                | 72.5%                 |
| Mother employed:                                        |                     |                      |                     |                        |                      |                       |
| Yes                                                     | 90.1%               | 90.6%                | 89.4%               | 89.4%                  | 90.3%                | 90.7%                 |
| No                                                      | 7.2%                | 6.8%                 | 7.6%                | 7.2%                   | 6.8%                 | 7.5%                  |
| Unknown                                                 | 2.8%                | 2.6%                 | 3.0%                | 3.4%                   | 2.9%                 | 1.8%                  |
| Father employed:                                        |                     |                      |                     |                        |                      |                       |
| Yes                                                     | 92.5%               | 92.4%                | 92.5%               | 92.2%                  | 92.4%                | 92.9%                 |
| No                                                      | 4.1%                | 4.4%                 | 3.8%                | 3.8%                   | 4.2%                 | 4.4%                  |
| Unknown                                                 | 3.4%                | 3.2%                 | 3.7%                | 4.0%                   | 3.5%                 | 2.6%                  |
| Subjective social status (1 = worst off, 10 = best off) | 7.29 (1.72)         | 7.19 (1.68)          | 7.41 (1.76)         | 7.3 (1.7)              | 7.2 (1.7)            | 7.3 (1.7)             |
| <b>Adolescent self-reported substance use*</b>          |                     |                      |                     |                        |                      |                       |
| Ever consumed alcohol <sup>b</sup>                      | 15.7%               | 15.3%                | 16.3%               | 9.3%                   | 14.2%                | 25.9%                 |
| Consumed alcohol in the last 30 days <sup>b</sup>       | 6.1%                | 6.5%                 | 5.6%                | 2.3%                   | 4.4%                 | 13.2%                 |
| Ever tried snus <sup>a,b</sup>                          | 8.9%                | 7.4%                 | 10.8%               | 3.6%                   | 10.7%                | 13.9%                 |
| Used snus in the last 30 days <sup>b</sup>              | 3.6%                | 3.0%                 | 4.3%                | 1.0%                   | 4.4%                 | 6.0%                  |
| Ever tried a cigarette <sup>a,b</sup>                   | 8.6%                | 7.11%                | 10.5%               | 4.0%                   | 9.1%                 | 14.1%                 |
| Smoked a cigarette in the last 30 days <sup>b</sup>     | 3.0%                | 2.7%                 | 3.4%                | 1.6%                   | 3.2%                 | 4.7%                  |
| Tried cannabis <sup>a,b</sup>                           | 1.3%                | 0.7%                 | 2.0%                | 0.2%                   | 1.4%                 | 2.5%                  |
| Tried other illicit drug                                | 0.9%                | 0.7%                 | 1.1%                | 0.6%                   | 1.1%                 | 0.8%                  |

Note:

\* Gender ( $\chi^2$ -tests) and cohort (logistic regressions) differences assessed for substance use outcomes only.

<sup>a</sup> denotes statistically significant gender differences at the  $p < 0.05$  level; <sup>b</sup> denotes statistically significant cohort differences at the  $p < 0.05$  level

Table 5 shows substance use outcomes in 2017 and 2018 for respondents at both time points to assess stability in use as well as the rate of starters and quitters. By 2018, a large majority had still never consumed alcohol, or tried snus, cigarettes, or cannabis. However, almost  $\frac{1}{4}$  of the respondents started to drink alcohol during this time period. Substantially fewer initiated the use of snus (7.2%), cigarettes (4.8%), and cannabis (2.8%). Proportions of those who ceased using alcohol, snus, cigarette, and cannabis between 2017 and 2018 were minimal (all < 3%).

**Table 5.**  
**Current substance use in 2017 and 2018 for those who participated in both QT waves, N = 2,514**

| Current use of: | Never | Only in 2017 | Only in 2018 | In 2017 and 2018 |
|-----------------|-------|--------------|--------------|------------------|
| Alcohol         | 66.7% | 1.6%         | 23.2%        | 8.5%             |
| Snus            | 86.7% | 2.6%         | 7.2%         | 3.5%             |
| Cigarette       | 92.7% | 1.4%         | 4.8%         | 1.2%             |
| Cannabis        | 96.1% | 0.4%         | 2.8%         | 0.7%             |

*Note:*

Current use = used at least once in the last 12 months

### QL preliminary results

Pilot study interviews indicated that the participants -- 12-13 year old at that time -- were highly skeptical of drinking. They believed that young people drink because they want to be cool, because they are miserable, or because of group pressure. These narratives were interpreted as reflecting a deep-rooted cultural ambivalence towards alcohol use in Norway while also suggesting that boundaries between 'adolescents' and 'adults' are fundamental when understanding emerging adolescent social identities, especially when it comes to drinking and drinking culture<sup>58</sup>.

Preliminary analysis of the main study interviews suggest a normalization of non-drinking among 15-16 year olds, and continued ambivalence in their perceptions of alcohol

1  
2  
3 use. While cigarette smoking was very uncommon, snus use was more common and socially  
4  
5 accepted; e-cigarettes seem to have some novelty value. Overall, substance use appeared not  
6  
7 to be at the core of many adolescents' self-image, which often centered on school  
8  
9 performance, sports and exercise, and ambitions and plans for the future. However, some  
10  
11 individual trajectories highlight vulnerability that may point towards future problem use of  
12  
13 alcohol and/or illegal substances.  
14  
15  
16  
17  
18  
19  
20  
21

## 22 **STRENGTHS AND LIMITATIONS**

23  
24 To the best of our knowledge, MyLife is the first longitudinal study of youth in Norway  
25  
26 to employ quantitative developmental assessments in combination with qualitative individual  
27  
28 and group interviewing in order to specifically examine substance use over the early life span.  
29  
30 The MyLife project aims to integrate multiple sources of data, multiple informants, and  
31  
32 multiple methodologies. In that respect, the project will significantly a) extend and augment  
33  
34 the knowledge gained by previous studies of adolescent health and adjustment in general,  
35  
36 and of substance use in particular, and b) contribute to both national and international  
37  
38 research and public health policy.  
39  
40  
41  
42  
43

44 As with all studies, there are important limitations. First, the non-alignment of the QT  
45  
46 and QL baselines resulted from administrative delays; nevertheless, the project largely  
47  
48 retained its multidisciplinary and mixed-methods character. Next, because of the privacy and  
49  
50 confidentiality concerns, the participating schools were not able to share parental contact info  
51  
52 with the MyLife team. For this reason, distribution of the project information booklets and  
53  
54 consent forms was outsourced to schools and ultimately to students themselves. Given this  
55  
56 reliance on young adolescents as liaisons, it is not known how many parents were properly  
57  
58  
59  
60

1  
2  
3 informed about the MyLife study. It is possible that the more vulnerable or high-risk  
4 adolescents were less likely to share this info with their parents, thus affecting the core sample  
5 characteristics. This also suggests that the utilized consent strategy, albeit the only ethically  
6 feasible one in our case, might have been less than optimal.  
7  
8  
9  
10  
11

12  
13 The related limitation concerns inferences and generalizability of our results. For  
14 example, given our inclusion criteria and sampling strategies, we may have missed the onset  
15 of substance use before grade 8<sup>th</sup> and among adolescents who may be particularly vulnerable  
16 for a range of negative outcomes. However, we can still identify those “early starters” in the  
17 core sample. Second, we do not aim to estimate national prevalence rates or to draw related  
18 inferences. Large-scale national monitoring efforts, such as the ESPAD<sup>71</sup>, are far more  
19 appropriate when population-level estimates and population-level generalizability are of  
20 primary interest. Rather, MyLife aims to draw inferences about the associations between the  
21 putative risk and protective factors and various substance use outcomes and patterns over  
22 time. In such cases, population-representative samples are not required, given appropriate  
23 control for confounding and avoidance of other biases<sup>72</sup>. Relatedly, a major criticism of  
24 longitudinal studies with non-representative samples is the lack of heterogeneity<sup>73</sup>. In our  
25 case, over-sampling from different geographical and socio-economic areas supports greater  
26 cohort heterogeneity than would have been obtained through the basic random sampling.  
27 Finally, identification of the factors associated with attrition may improve future retention  
28 rates, especially for those participants followed-up individually.  
29  
30  
31  
32  
33  
34  
35  
36  
37  
38  
39  
40  
41  
42  
43  
44  
45  
46  
47  
48  
49  
50  
51

### 52 **Future plans**

53  
54 Both study arms have planned individual adolescent follow-ups through 2021 (see  
55 Figure 1). Specifically, three more QT annual rounds are scheduled for 2019, 2020, and 2021.  
56  
57  
58  
59  
60

1  
2  
3 The planned procedures and data collection strategies are identical as for the 2018, but after  
4  
5 2019 the entire cohort -- having graduated middle school -- will be contacted and assessed  
6  
7 individually. QL follow-ups will be conducted as individual interviews, specifically during the  
8  
9 spring of 2019 (i.e., the first year of high school), and spring 2021 (i.e., the final year of high  
10  
11 school).  
12  
13  
14

15  
16 Norway has rich information about each of its municipalities, particularly indicators of  
17  
18 socio-economic status such as the unemployment rate, income disparity, and educational  
19  
20 level. Similar information is available for schools, in addition to the information provided by  
21  
22 school administrators. These characteristics can be linked to both aggregate- and individual-  
23  
24 level data and be included in the planned mixed-methods and multilevel analyses.  
25  
26  
27

28  
29 Further, parental consent was obtained for individual-level linkages of questionnaire  
30  
31 data to the national-level administrative sources of data, such as health, education, and labor  
32  
33 and social registries<sup>60</sup>. These registries can provide additional information on putative risk  
34  
35 exposures, as well as on the range of long-term outcomes for MyLife adolescents through  
36  
37 continually and prospectively updated individual registry records. Registry linkages will be  
38  
39 made for all cohort members, including parents, following the necessary administrative  
40  
41 approvals; identifying National Identity Numbers have already been obtained from the  
42  
43 Population Registry.  
44  
45  
46  
47  
48  
49  
50  
51  
52  
53  
54  
55  
56  
57  
58  
59  
60



1  
2  
3 **Acknowledgements:** We thank all participating students and their families, as well as all the  
4 schools and teachers who assisted with the MyLife data collection. The authors would like to  
5  
6 acknowledge the important contributions to the MyLife project made by the following  
7  
8 individuals: Camilla Stub Lundberg, Mads Toftgaard, Silje Bakken, Øystein Skjælaaen, Skule  
9  
10 Wigenstad, Marie Svendsen Nerheim, Tilmann von Soest, and Kristina Jackson.  
11  
12

13  
14  
15 **Contributors:** GSB and JBA drafted the manuscript, with substantive contributions from JS, RT,  
16  
17 and KB. JBA, EK, and GSB designed and established the Quantitative arm of the MyLife project,  
18  
19 while JS and RT designed and established the Qualitative arm. JBA, GSB, and JS remain  
20  
21 responsible for the scientific direction and continued management of the project as a whole,  
22  
23 with the assistance from EK, RT and KB. All authors reviewed, critically revised, and approved  
24  
25 the manuscript.  
26  
27

28  
29  
30 **Funding:** This research received no specific grant from any funding agency in the public,  
31  
32 commercial or not-for-profit sectors.  
33  
34

35  
36 **Competing interests:** None.  
37  
38

39  
40 **Participants' consent for publication:** Obtained. Paper-and-pencil informed parental consent  
41  
42 and assent following parental consent were obtained for adolescents (electronic in the QT  
43  
44 arm; oral in the QL arm); paper-and-pencil informed consent was obtained for parents.  
45  
46 Participation is entirely voluntary and participants -- both adolescents and parents -- are free  
47  
48 to withdraw at any time to request deletion of information collected on them so far.  
49  
50

51  
52 **Ethics approval:** The MyLife project received approval by the Norwegian Data Protection  
53  
54 Authority (DPA) (reference no.: 15/01495) after ethical evaluation by The National Committee  
55  
56 for Research Ethics in the Social Sciences and the Humanities (reference no.: 2016/137). All  
57  
58 participants were fully informed about the study.  
59  
60

1  
2  
3 Additional approvals from relevant authorities will be sought on an as-needed basis for  
4  
5 future individual-level data linkages (i.e., national social and health registries) and for potential  
6  
7 study extensions.  
8  
9

10  
11 **Provenance and peer review:** N/A.  
12  
13

14 **Data sharing statement:** Researchers interested in collaboration are both welcomed and  
15  
16 invited to propose research projects by contacting the MyLife team. The MyLife dataset is  
17  
18 administrated by the NIPH.  
19  
20

21 **Open access:** This is an open access article distributed in accordance with the Creative  
22  
23 Commons Attribution Non Commercial (CC BY-NC 4.0) license, which permits others to  
24  
25 distribute, remix, adapt, build upon this work non-commercially, and license their derivative  
26  
27 works on different terms, provided the original work is properly cited, appropriate credit is  
28  
29 given, any changes made indicated, and the use is non-commercial. See:  
30  
31 <http://creativecommons.org/licenses/by-nc/4.0/>  
32  
33  
34  
35  
36  
37  
38  
39  
40  
41  
42  
43  
44  
45  
46  
47  
48  
49  
50  
51  
52  
53  
54  
55  
56  
57  
58  
59  
60

## REFERENCES

1. Aarons GA, Brown SA, Coe MT, et al. Adolescent alcohol and drug abuse and health. *Journal of Adolescent Health* 1999;24(6):412-21.
2. U.S. Department of Health and Human Services OotSG. The Surgeon General's Call to Action To Prevent and Reduce Underage Drinking, 2007.
3. Moss HB, Chen CM, Yi H-y. Early adolescent patterns of alcohol, cigarettes, and marijuana polysubstance use and young adult substance use outcomes in a nationally representative sample. *Drug and alcohol dependence* 2014;136:51-62. doi: <https://doi.org/10.1016/j.drugalcdep.2013.12.011>
4. Degenhardt L, Charlson F, Ferrari A, et al. The global burden of disease attributable to alcohol and drug use in 195 countries and territories, 1990&#x2013;2016: a systematic analysis for the Global Burden of Disease Study 2016. *The Lancet Psychiatry* 2018;5(12):987-1012. doi: 10.1016/S2215-0366(18)30337-7
5. Institute for Health Metrics and Evaluation. GBD Compare Seattle, WA: IHME, University of Washington; 2018 [Available from: <http://vizhub.healthdata.org/gbd-compare> accessed November 8 2018.
6. Erskine HE, Moffitt TE, Copeland WE, et al. A heavy burden on young minds: the global burden of mental and substance use disorders in children and youth. *Psychological medicine* 2015;45(7):1551-63. doi: 10.1017/S0033291714002888 [published Online First: 12/23]
7. Hawkins JD, Catalano RF, Miller JY. Risk and protective factors for alcohol and other drug problems in adolescence and early adulthood: Implications for substance abuse prevention. *Psychological Bulletin* 1992;112(1):64-105.
8. Sloboda Z, Glantz MD, Tarter RE. Revisiting the concepts of risk and protective factors for understanding the etiology and development of substance use and substance use disorders: Implications for prevention. *Substance Use & Misuse* 2012;47(8-9):944-62. doi: 10.3109/10826084.2012.663280
9. Stone AL, Becker LG, Huber AM, et al. Review of risk and protective factors of substance use and problem use in emerging adulthood. *Addictive Behaviors* 2012;37(7):747-75. doi: <https://doi.org/10.1016/j.addbeh.2012.02.014>
10. Chassin L, Pitts SC, Prost J. Binge drinking trajectories from adolescence to emerging adulthood in a high-risk sample: Predictors and substance abuse outcomes. *Journal of Consulting and Clinical Psychology* 2002;70(1):67-78.
11. Jackson KM, Sher KJ, Schulenberg JE. Conjoint developmental trajectories of young adult substance use. *Alcoholism-Clinical and Experimental Research* 2008;32(5):723-37. doi: 10.1111/j.1530-0277.2008.00643.x
12. Orlando M, Tucker JS, Ellickson PL, et al. Concurrent use of alcohol and cigarettes from adolescence to young adulthood: An examination of developmental trajectories and outcome. *Substance Use and Misuse* 2005;40:1051-69.
13. Patton GC, Coffey C, Lynskey MT, et al. Trajectories of adolescent alcohol and cannabis use into young adulthood. *Addiction* 2007;102(4):607-15. doi: 10.1111/j.1360-0443.2006.01728.x
14. Guo J, Collins LM, Hill KG, et al. Developmental pathways to alcohol abuse and dependence in young adulthood. *Journal of studies on alcohol* 2000;61(6):799-808. doi: 10.15288/jsa.2000.61.799
15. Chen P, Jacobson KC. Developmental trajectories of substance use from early adolescence to young adulthood: gender and racial/ethnic differences. *J Adolesc Health* 2012;50(2):154-63. doi: 10.1016/j.jadohealth.2011.05.013 [published Online First: 07/13]
16. Englund MM, Egeland B, Oliva EM, et al. Childhood and adolescent predictors of heavy drinking and alcohol use disorders in early adulthood: a longitudinal developmental analysis. *Addiction* 2008;103(s1):23-35. doi: 10.1111/j.1360-0443.2008.02174.x
17. Clark DB. The natural history of adolescent alcohol use disorders. *Addiction* 2004;99(s2):5-22. doi: 10.1111/j.1360-0443.2004.00851.x

18. E. Settles R, T. Smith G. Toward a Developmentally Centered Approach to Adolescent Alcohol and Substance Use Treatment. *Current Drug Abuse Reviews* 2015;8(2):134-51.
19. Glantz MD, Leshner AI. Drug abuse and developmental psychopathology. *Development and psychopathology* 2000;12(4):795-814. [published Online First: 2001/02/24]
20. Chassin L, Sher KJ, Hussong A, et al. The developmental psychopathology of alcohol use and alcohol disorders: research achievements and future directions. *Development and psychopathology* 2013;25(4 Pt 2):1567-84. doi: 10.1017/S0954579413000771
21. Thomas YF. The Social Epidemiology of Drug Abuse. *American Journal of Preventive Medicine* 2007;32(6):S141-S46. doi: 10.1016/j.amepre.2007.03.007
22. Ennett ST, Foshee VA, Bauman KE, et al. The social ecology of adolescent alcohol misuse. *Child development* 2008;79(6):1777-91.
23. Galea S, Nandi A, Vlahov D. The Social Epidemiology of Substance Use. *Epidemiologic Reviews* 2004;26(1):36-52. doi: 10.1093/epirev/mxh007
24. Bronfenbrenner U. Toward an experimental ecology of human development. *American Psychologist* 1977;32(7):513-31. doi: 10.1037/0003-066X.32.7.513
25. Costello EJ, Angold AC. Developmental Epidemiology. In: Sameroff AJ, Lewis M, Miller SM, eds. *Handbook of Developmental Psychopathology*. Boston, MA: Springer US 2000:57-73.
26. Hser YI, Longshore D, Anglin MD. The life course perspective on drug use: a conceptual framework for understanding drug use trajectories. *Eval Rev* 2007;31(6):515-47. doi: 10.1177/0193841x07307316 [published Online First: 2007/11/08]
27. Boyce WT, Frank E, Jensen PS, et al. Social context in developmental psychopathology: recommendations for future research from the MacArthur Network on Psychopathology and Development. The MacArthur Foundation Research Network on Psychopathology and Development. *Development and psychopathology* 1998;10(2):143-64. [published Online First: 1998/06/23]
28. Castellanos-Ryan N, O'Leary-Barrett M, Conrod PJ. Substance-use in Childhood and Adolescence: A Brief Overview of Developmental Processes and their Clinical Implications. *J Can Acad Child Adolesc Psychiatry* 2013;22(1):41-46.
29. Palmer RH, Young SE, Hopfer CJ, et al. Developmental epidemiology of drug use and abuse in adolescence and young adulthood: Evidence of generalized risk. *Drug and alcohol dependence* 2009;102(1-3):78-87. doi: 10.1016/j.drugalcdep.2009.01.012 [published Online First: 2009/03/03]
30. Swift W, Coffey C, Carlin JB, et al. Adolescent cannabis users at 24 years: Trajectories to regular weekly use and dependence in young adulthood. *Addiction* 2008;103(8):1361-70. doi: 10.1111/j.1360-0443.2008.02246.x
31. Yoshikawa H, Weisner TS, Kalil A, et al. Mixing qualitative and quantitative research in developmental science: uses and methodological choices. *Developmental psychology* 2008;44(2):344-54. doi: 10.1037/0012-1649.44.2.344 [published Online First: 2008/03/12]
32. Sullivan ML. Integrating qualitative and quantitative methods in the study of developmental psychopathology in context. *Development and psychopathology* 1998;10(2):377-93. [published Online First: 1998/06/23]
33. Creswell JW KA, Plano Clark VL, Smith KC for the Office of Behavioral and Social Sciences Research. *Best practices for mixed methods research in the health sciences: National Institutes of Health.*, 2011.
34. Teddlie C, Tashakkori A. *Foundations of Mixed Methods Research: Integrating Quantitative and Qualitative Approaches in the Social and Behavioral Sciences*: SAGE Publications 2009.
35. Nathan S, Rawstorne P, Hayen A, et al. Examining the pathways for young people with drug and alcohol dependence: a mixed-method design to examine the role of a treatment programme. *BMJ open* 2016;6(5):e010824. doi: 10.1136/bmjopen-2015-010824 [published Online First: 2016/05/27]

- 1  
2  
3 36. Østergaard J. Learning to become an alcohol user: Adolescents taking risks and parents living with  
4 uncertainty. *Addiction Research & Theory* 2009;17(1):30-53. doi:  
5 10.1080/16066350802161196
- 6 37. Folkehelseinstituttet. Ti store folkehelseutfordringer i Norge. Hva sier analyse av sykdomsbyrde? .  
7 Oslo: Folkehelseinstituttet, 2018.
- 8 38. Erevik EK, Pallesen S, Vedaa Ø, et al. Alcohol use among Norwegian students: Demographics,  
9 personality and psychological health correlates of drinking patterns. *Nordic Studies on Alcohol  
10 and Drugs* 2017;34(5):415-29. doi: 10.1177/1455072517709918
- 11 39. Burdzovic Andreas J, Pape H. Who receives cannabis use offers: A general population study of  
12 adolescents. *Drug and alcohol dependence* 2015;156:150-56. doi:  
13 <https://doi.org/10.1016/j.drugalcdep.2015.09.009>
- 14 40. Pape H, Norström T, Rossow I. Adolescent drinking—a touch of social class? *Addiction*  
15 2017;112(5):792-800. doi: doi:10.1111/add.13721
- 16 41. Burdzovic Andreas J, Pape H, Bretteville-Jensen AL. Who are the adolescents saying "No" to  
17 cannabis offers. *Drug and alcohol dependence* 2016;163:64-70. doi:  
18 10.1016/j.drugalcdep.2016.03.025 [published Online First: 2016/04/25]
- 19 42. Burdzovic Andreas J, Bretteville-Jensen AL. Ready, willing, and able: The role of cannabis use  
20 opportunities in understanding adolescent cannabis use. *Addiction* 2017;112:1973-82. doi:  
21 10.1111/add.13901
- 22 43. Pape H, Bye EK. Drinking with parents: Different measures, different associations with underage  
23 heavy drinking? *Nordic Studies on Alcohol and Drugs* 2017;34(6):445-55. doi:  
24 10.1177/1455072517740235
- 25 44. Pape H, Rossow I, Storvoll EE. Under double influence: Assessment of simultaneous alcohol and  
26 cannabis use in general youth populations. *Drug and alcohol dependence* 2009;101(1-2):69-  
27 73. doi: 10.1016/j.drugalcdep.2008.11.002
- 28 45. Sandberg S, Skjælaaen Ø. "Shoes on your hands": perceptions of alcohol among young adolescents  
29 in Norway. *Drugs: Education, Prevention and Policy* 2018;25(6):449-56. doi:  
30 10.1080/09687637.2017.1335690
- 31 46. Strandheim A, Holmen TL, Coombes L, et al. Alcohol intoxication and mental health among  
32 adolescents—a population review of 8983 young people, 13-19 years in North-Trøndelag,  
33 Norway: the Young-HUNT Study. *Child Adolesc Psychiatry Ment Health* 2009;3(1):18. doi:  
34 10.1186/1753-2000-3-18 [published Online First: 2009/06/25]
- 35 47. Brunborg GS, Norström T, Storvoll EE. Latent developmental trajectories of episodic heavy drinking  
36 from adolescence to early adulthood: Predictors of trajectory groups and alcohol problems in  
37 early adulthood as outcome. *Drug and Alcohol Review* 2018;37(3):389-95. doi:  
38 doi:10.1111/dar.12565
- 39 48. Enstad F, Pedersen W, Nilsen W, et al. Predicting early onset of intoxication versus drinking—A  
40 population-based prospective study of Norwegian adolescents. *Addictive behaviors reports*  
41 2017;6:1-7.
- 42 49. Brunborg GS, Andreas JB, Kvaavik E. Social media use and episodic heavy drinking among  
43 adolescents. *Psychological reports* 2017;120(3):475-90.
- 44 50. Brunborg GS, Hanss D, Mentzoni RA, et al. Core and peripheral criteria of video game addiction in  
45 the game addiction scale for adolescents. *Cyberpsychology, behavior and social networking*  
46 2015;18(5):280-5. doi: 10.1089/cyber.2014.0509 [published Online First: 2015/04/01]
- 47 51. Mentzoni RA, Brunborg GS, Molde H, et al. Problematic video game use: estimated prevalence and  
48 associations with mental and physical health. *Cyberpsychology, behavior and social  
49 networking* 2011;14(10):591-6. doi: 10.1089/cyber.2010.0260 [published Online First:  
50 2011/02/24]
- 51 52. Brunborg GS, Burdzovic Andreas J. Increase in time spent on social media is associated with modest  
52 increase in depression, conduct problems, and episodic heavy drinking. *Journal of Adolescence*  
53 2019;74:201-09. doi: <https://doi.org/10.1016/j.adolescence.2019.06.013>
- 54  
55  
56  
57  
58  
59  
60

- 1  
2  
3 53. Hines LA, Morley KI, Strang J, et al. Onset of opportunity to use cannabis and progression from  
4 opportunity to dependence: Are influences consistent across transitions? *Drug and alcohol*  
5 *dependence* 2016;160:57-64. doi: 10.1016/j.drugalcdep.2015.12.032 [published Online First:  
6 2016/01/27]  
7  
8 54. Abebe DS, Hafstad GS, Brunborg GS, et al. Binge Drinking, Cannabis and Tobacco Use Among Ethnic  
9 Norwegian and Ethnic Minority Adolescents in Oslo, Norway. *Journal of immigrant and*  
10 *minority health* 2015;17(4):992-1001. doi: 10.1007/s10903-014-0077-9 [published Online  
11 First: 2014/07/20]  
12  
13 55. Burdzovic Andreas J, Brunborg GS. Depressive symptomatology among Norwegian adolescent boys  
14 and girls: The Patient Health Questionnaire-9 (PHQ-9) psychometric properties and correlates.  
15 *Frontiers in Psychology* 2017;8:887.  
16  
17 56. Pape H, Rossow I, Brunborg GS. Adolescents drink less: How, who and why? A review of the recent  
18 research literature. *Drug and alcohol review* 2018;37:S98-S114.  
19  
20 57. Burdzovic Andreas J. Perceived harmfulness of various alcohol- and cannabis use modes: Secular  
21 trends, differences, and associations with actual substance use behaviors among Norwegian  
22 adolescents, 2007-2015. *Drug and alcohol dependence* 2019;197:280-87. doi:  
23 10.1016/j.drugalcdep.2019.02.003 [published Online First: 2019/03/16]  
24  
25 58. Bakken SA, Sandøy TA, Sandberg S. Social identity and alcohol in young adolescence: The perceived  
26 difference between youthful and adult drinking. *Journal of youth studies* 2017;20(10):1380-95.  
27  
28 59. Scheffels J, Moan IS, Storvoll E. Everything in Moderation? A Mixed Methods Study on Perceptions  
29 of Parents' Drinking in the Presence of Children. *Nordic Studies on Alcohol and Drugs*  
30 2016;33(5-6):551-66. doi: 10.1515/nsad-2016-0045  
31  
32 60. Research Council of Norway. Health Registries for Research (HRR): Facilitating the use and security  
33 of Norwegian health registries in research 2019 [Available from: <https://hrr.w.uib.no/>.  
34  
35 61. Galbraith S, Bowden J, Mander A. Accelerated longitudinal designs: An overview of modelling,  
36 power, costs and handling missing data. *Statistical Methods in Medical Research*  
37 2017;26(1):374-98. doi: 10.1177/0962280214547150  
38  
39 62. Duncan SC, Duncan TE, Hops H. Analysis of longitudinal data within accelerated longitudinal  
40 designs. *Psychological Methods* 1996;1(3):236-48. doi: 10.1037/1082-989X.1.3.236  
41  
42 63. Willett JB, Singer JD, Martin NC. The design and analysis of longitudinal studies of development  
43 and psychopathology in context: statistical models and methodological recommendations.  
44 *Development and psychopathology* 1998;10(2):395-426. [published Online First: 1998/06/23]  
45  
46 64. Collins LM. Analysis of longitudinal data: The integration of theoretical model, temporal design,  
47 and statistical model. *Annual Review of Psychology* 2006;57:505-28. doi:  
48 10.1146/annurev.psych.57.102904.190146  
49  
50 65. Raudenbush SW, Chan W-s. Growth curve analysis in accelerated longitudinal designs. *Journal of*  
51 *Research in Crime and Delinquency* 1992;29(4):387-411. doi: 10.1177/0022427892029004001  
52  
53 66. Nagin DS, Jones BL, Passos VL, et al. Group-based multi-trajectory modeling. *Statistical Methods in*  
54 *Medical Research* 2016;27(7):2015-23. doi: 10.1177/0962280216673085  
55  
56 67. Li F, Duncan TE, Hops H. Examining developmental trajectories in adolescent alcohol use using  
57 piecewise growth mixture modeling analysis. *Journal of studies on alcohol* 2001;62(2):199-210.  
58 [published Online First: 2001/05/01]  
59  
60 68. Grosseohme D, Lipstein E. Analyzing longitudinal qualitative data: the application of trajectory and  
recurrent cross-sectional approaches. *BMC research notes* 2016;9:136. doi: 10.1186/s13104-  
016-1954-1 [published Online First: 2016/03/05]  
69. The Human Development Report 2010 Team. Human development report 2010, 20th anniversary  
edition: The real wealth of nations, pathways to human development. New York, NY: United  
Nations Development Programme 2010.  
70. Rogstad L. Indeks for levekårsproblemer. *Samfunnsspeilet* 2002;16:106-08.  
71. Kraus L, Nociar A. ESPAD report 2015: results from the European school survey project on alcohol  
and other drugs: European Monitoring Centre for Drugs and Drug Addiction 2016.

- 1  
2  
3 72. Rothman KJ, Gallacher JE, Hatch EE. Why representativeness should be avoided. *International*  
4 *journal of epidemiology* 2013;42(4):1012-14.  
5 73. Richiardi L, Pizzi C, Pearce N. Commentary: Representativeness is usually not necessary and often  
6 should be avoided. *International journal of epidemiology* 2013;42(4):1018-22.  
7  
8  
9  
10  
11  
12  
13  
14  
15  
16  
17  
18  
19  
20  
21  
22  
23  
24  
25  
26  
27  
28  
29  
30  
31  
32  
33  
34  
35  
36  
37  
38  
39  
40  
41  
42  
43  
44  
45  
46  
47  
48  
49  
50  
51  
52  
53  
54  
55  
56  
57  
58  
59  
60

For peer review only

1  
2  
3  
4  
5  
6  
7  
8  
9  
10  
11  
12  
13  
14  
15  
16  
17  
18  
19  
20  
21  
22  
23  
24  
25  
26  
27  
28  
29  
30  
31  
32  
33  
34  
35  
36  
37  
38  
39  
40  
41  
42  
43  
44  
45  
46  
47  
48  
49  
50  
51  
52  
53  
54  
55  
56  
57  
58  
59  
60

**FIGURE CAPTIONS**

**Figure 1.**  
**MyLife study design, data sources, and planned assessments.**

**Figure 2.**  
**MyLife cohort geographic representation.**

**Figure 3.**  
**Flow chart for the recruitment of the quantitative arm (QT) of the MyLife study.**

**Figure 4.**  
**Flow chart for the recruitment of the qualitative arm (QL) of the MyLife study.**

For peer review only



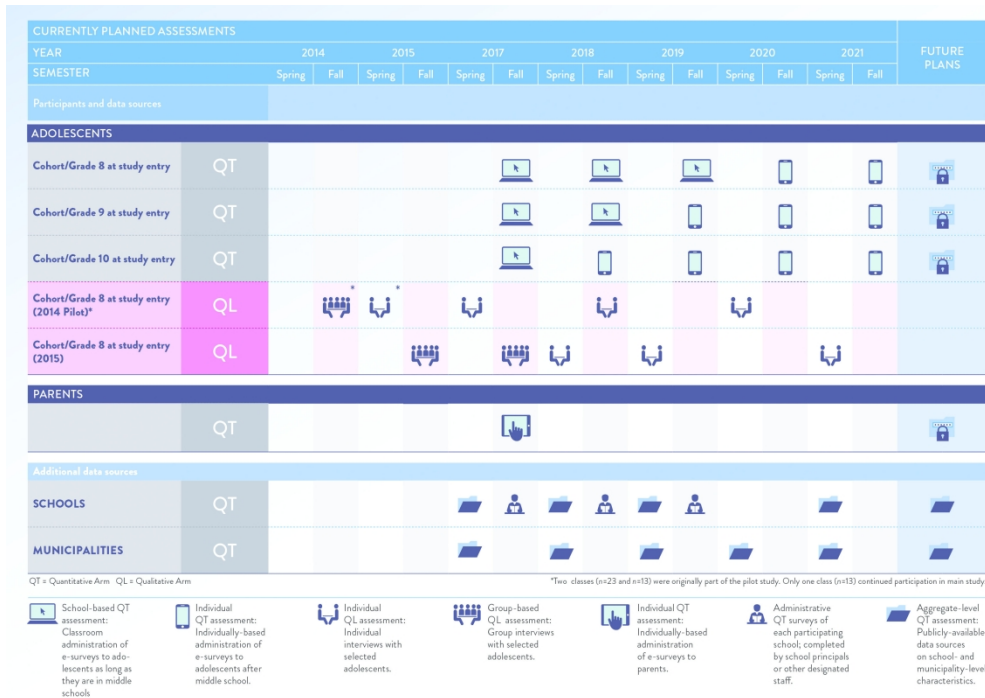

Figure 1. MyLife study design, data sources, and planned assessments.

279x194mm (300 x 300 DPI)

1  
2  
3  
4  
5  
6  
7  
8  
9  
10  
11  
12  
13  
14  
15  
16  
17  
18  
19  
20  
21  
22  
23  
24  
25  
26  
27  
28  
29  
30  
31  
32  
33  
34  
35  
36  
37  
38  
39  
40  
41  
42  
43  
44  
45  
46  
47  
48  
49  
50  
51  
52  
53  
54  
55  
56  
57  
58  
59  
60

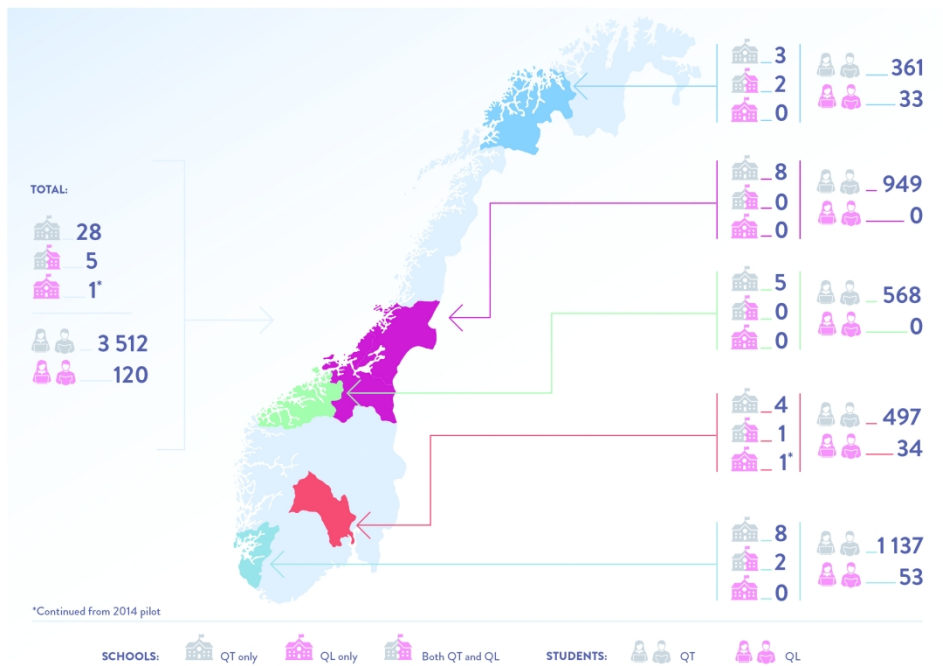

Figure 2. MyLife cohort geographic representation.

297x209mm (300 x 300 DPI)

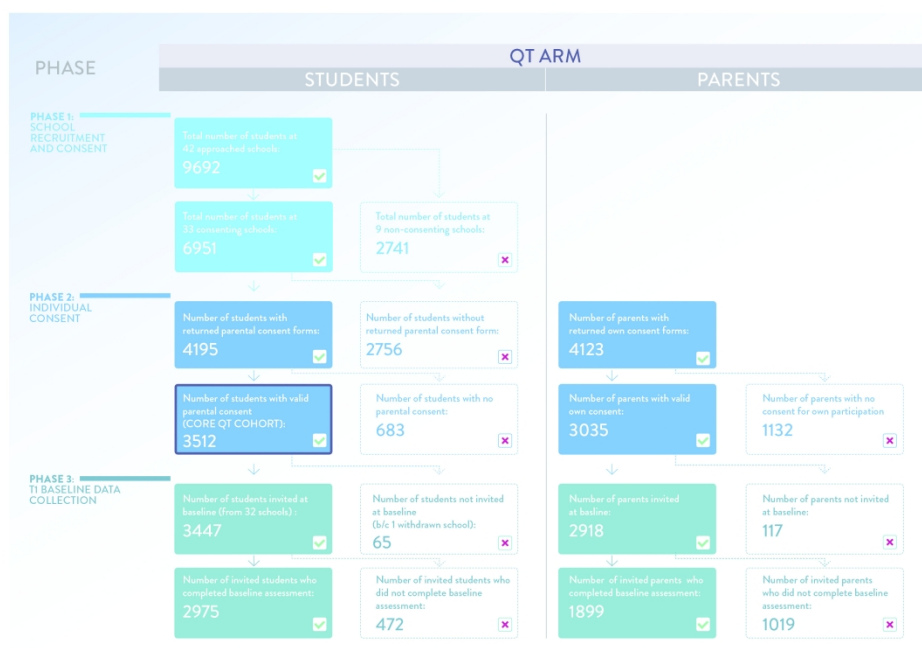

Figure 3. MyLife QT arm recruitment.

297x209mm (300 x 300 DPI)

1  
2  
3  
4  
5  
6  
7  
8  
9  
10  
11  
12  
13  
14  
15  
16  
17  
18  
19  
20  
21  
22  
23  
24  
25  
26  
27  
28  
29  
30  
31  
32  
33  
34  
35  
36  
37  
38  
39  
40  
41  
42  
43  
44  
45  
46  
47  
48  
49  
50  
51  
52  
53  
54  
55  
56  
57  
58  
59  
60

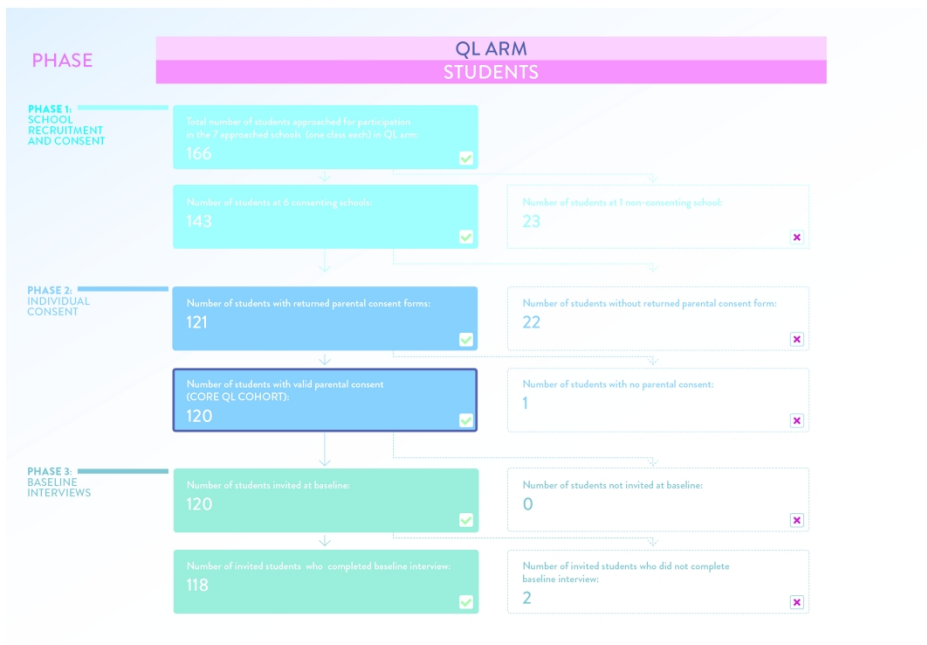

Figure 4. MyLife QL arm recruitment

297x209mm (300 x 300 DPI)
